# Supplementary material for: Comprehensive analysis of the correlations of S100B with hypoxia response and immune infiltration in hepatocellular carcinoma
Source: PeerJ. 2022 Mar 29;10:e13201. doi: 10.7717/peerj.13201 (PMC8973469; doi:10.7717/peerj.13201)
Supplement: Supplemental Information 4 [file peerj-10-13201-s004.xlsx]

## Sheet: all coexpressed genes
Query	Statistic	P-value	FDR (BH)	Event_SD	Event_TD
A1BG	-0.154465	0.00285355	0.00718599	360	371
A1CF	-0.238661	3.33905e-06	1.6324e-05	360	370
A2BP1	0.0537374	0.301928	0.397976	360	61
A2LD1	-0.180945	0.000461025	0.0014275	360	371
A2ML1	0.0246246	0.636374	0.715495	360	85
A2M	0.127294	0.0141445	0.0292888	360	371
A4GALT	0.251541	9.20992e-07	4.99401e-06	360	371
A4GNT	0.276676	6.05142e-08	4.10335e-07	360	174
AAA1	0.0483754	0.352798	0.450318	360	194
AAAS	-0.0456195	0.380929	0.478884	360	371
AACSL	0.147277	0.00447335	0.0106946	360	114
AACS	0.256665	5.40831e-07	3.06964e-06	360	371
AADACL2	-0.0123923	0.811962	0.85946	360	23
AADACL3	0.0217458	0.67632	0.748578	360	36
AADACL4	-0.0714229	0.16981	0.247963	360	39
AADAC	-0.194922	0.000158034	0.000543756	360	370
AADAT	-0.2065	6.14094e-05	0.00023188	360	370
AAGAB	0.161001	0.00186484	0.00492919	360	371
AAK1	0.17037	0.000985605	0.00280664	360	371
AAMP	0.0526327	0.311989	0.408508	360	371
AANAT	0.115024	0.0267329	0.0509639	360	131
AARS2	-0.179651	0.00050712	0.001555	360	371
AARSD1	0.00388845	0.940498	0.957953	360	371
AARS	-0.0495524	0.341193	0.438674	360	371
AASDHPPT	-0.0602011	0.247398	0.338368	360	371
AASDH	-0.0477216	0.359351	0.456888	360	371
AASS	-0.344631	8.73762e-12	1.03807e-10	360	370
AATF	0.119476	0.0213494	0.0419244	360	371
AATK	0.215675	2.79458e-05	0.000113669	360	371
ABAT	-0.346044	7.09457e-12	8.55557e-11	360	371
ABCA10	-0.0346557	0.505754	0.5986	360	371
ABCA11P	0.139102	0.00728972	0.0163819	360	371
ABCA12	0.17507	0.000706859	0.00209181	360	165
ABCA13	0.0717593	0.167803	0.245536	360	312
ABCA17P	-0.0266402	0.609011	0.691915	360	319
ABCA1	0.0494346	0.342343	0.439862	360	371
ABCA2	0.000754912	0.988438	0.992073	360	371
ABCA3	0.159257	0.00209225	0.00544516	360	371
ABCA4	0.0544404	0.295638	0.391316	360	370
ABCA5	-0.274864	7.43341e-08	4.96441e-07	360	371
ABCA6	-0.334488	3.78196e-11	4.11268e-10	360	371
ABCA7	0.173266	0.000803861	0.0023437	360	371
ABCA8	-0.195622	0.000149485	0.000516393	360	368
ABCA9	-0.183879	0.000370547	0.00117027	360	370
ABCB10	-0.18826	0.000265762	0.000865399	360	371
ABCB11	-0.28806	1.60541e-08	1.20645e-07	360	363
ABCB1	-0.0387783	0.456464	0.55227	360	371
ABCB4	-0.29801	4.79177e-09	3.88213e-08	360	371
ABCB5	0.132624	0.0105519	0.0226047	360	225
ABCB6	-0.0729249	0.160987	0.237007	360	371
ABCB7	-0.0846717	0.103458	0.163475	360	371
ABCB8	-0.158259	0.00223358	0.00577287	360	371
ABCB9	0.190368	0.000225881	0.000747261	360	371
ABCC10	0.184899	0.0003432	0.00109238	360	371
ABCC11	-0.253827	7.27319e-07	4.01821e-06	360	371
ABCC12	-0.0886786	0.0880698	0.142726	360	112
ABCC13	-0.0854791	0.100197	0.159054	360	90
ABCC1	0.376932	5.70456e-14	8.81663e-13	360	371
ABCC2	-0.216031	2.70865e-05	0.000110555	360	371
ABCC3	0.00832623	0.87301	0.907832	360	371
ABCC4	0.118113	0.0228871	0.0445663	360	371
ABCC5	0.361973	6.29397e-13	8.55894e-12	360	371
ABCC6P1	-0.254566	6.73586e-07	3.74523e-06	360	367
ABCC6P2	-0.227784	9.37914e-06	4.18855e-05	360	371
ABCC6	-0.325823	1.26815e-10	1.28832e-09	360	371
ABCC8	0.0896369	0.0846764	0.137939	360	243
ABCC9	-0.285834	2.09074e-08	1.54152e-07	360	371
ABCD1	0.0873721	0.0928716	0.149185	360	371
ABCD2	0.384228	1.68979e-14	2.78906e-13	360	342
ABCD3	-0.247828	1.34498e-06	7.07545e-06	360	371
ABCD4	0.0164912	0.751552	0.81125	360	371
ABCE1	0.0436022	0.402367	0.500997	360	371
ABCF1	-0.00691205	0.89444	0.924641	360	371
ABCF2	0.172099	0.000873007	0.00252388	360	371
ABCF3	-0.124845	0.0161284	0.0328369	360	371
ABCG1	0.255815	5.91231e-07	3.32538e-06	360	371
ABCG2	-0.227176	9.92192e-06	4.41314e-05	360	371
ABCG4	0.138285	0.00764425	0.0170928	360	308
ABCG5	-0.249362	1.15101e-06	6.13769e-06	360	370
ABCG8	-0.239111	3.19598e-06	1.56939e-05	360	366
ABHD10	-0.164219	0.00150368	0.00407901	360	371
ABHD11	0.0640426	0.218454	0.305256	360	371
ABHD12B	-0.123661	0.0171726	0.0346794	360	308
ABHD12	0.0911985	0.0793729	0.130403	360	371
ABHD13	-0.0474368	0.362229	0.459551	360	371
ABHD14A	-0.0842649	0.105133	0.165688	360	371
ABHD14B	-0.242729	2.24035e-06	1.12967e-05	360	371
ABHD15	-0.220763	1.77943e-05	7.53449e-05	360	371
ABHD1	-0.305816	1.79582e-09	1.54742e-08	360	366
ABHD2	-0.190482	0.000223896	0.000741803	360	371
ABHD3	0.12544	0.0156256	0.031904	360	371
ABHD4	-0.0474406	0.36219	0.45953	360	371
ABHD5	-0.236674	4.04758e-06	1.95197e-05	360	371
ABHD6	-0.261544	3.22317e-07	1.91107e-06	360	371
ABHD8	-0.0832409	0.109443	0.171342	360	371
ABI1	0.0896177	0.0847431	0.138008	360	371
ABI2	0.378643	4.30033e-14	6.75107e-13	360	371
ABI3BP	0.346037	7.10209e-12	8.55946e-11	360	371
ABI3	0.610927	2.4913e-39	2.57159e-37	360	371
ABL1	0.0820839	0.114479	0.17769	360	371
ABL2	0.15861	0.00218282	0.00565269	360	371
ABLIM1	-0.0325567	0.531882	0.622644	360	371
ABLIM2	0.149981	0.00378573	0.00921433	360	371
ABLIM3	0.0618041	0.235011	0.32432	360	371
ABO	-0.0377492	0.468509	0.563247	360	227
ABP1	0.126878	0.0144653	0.02986	360	345
ABRA	0.125444	0.0156222	0.031904	360	139
ABR	0.509303	7.03416e-26	2.76399e-24	360	371
ABT1	-0.0523262	0.314819	0.411564	360	371
ABTB1	0.0943196	0.0695792	0.116493	360	371
ABTB2	-0.3004	3.55882e-09	2.94308e-08	360	371
ACAA1	-0.258114	4.64296e-07	2.67178e-06	360	371
ACAA2	-0.23526	4.63678e-06	2.21108e-05	360	371
ACACA	-0.0608441	0.242376	0.332847	360	371
ACACB	-0.269407	1.3689e-07	8.68302e-07	360	371
ACAD10	-0.22474	1.24123e-05	5.41088e-05	360	371
ACAD11	-0.352876	2.55212e-12	3.25501e-11	360	371
ACAD8	-0.177775	0.000581548	0.00175875	360	371
ACAD9	-0.156461	0.00251021	0.00640804	360	371
ACADL	-0.259956	3.81885e-07	2.23631e-06	360	360
ACADM	-0.267363	1.71475e-07	1.06754e-06	360	371
ACADSB	-0.341606	1.36018e-11	1.57269e-10	360	371
ACADS	-0.231099	6.88243e-06	3.1491e-05	360	371
ACADVL	-0.0284589	0.584779	0.670232	360	371
ACAN	0.364657	4.12871e-13	5.74788e-12	360	350
ACAP1	0.681556	5.45245e-52	2.78522e-49	360	371
ACAP2	0.046308	0.373776	0.471438	360	371
ACAP3	0.00013027	0.998005	0.998477	360	371
ACAT1	-0.177361	0.000599309	0.00180813	360	371
ACAT2	-0.11296	0.0296008	0.0557138	360	371
ACBD3	0.0574717	0.269524	0.362605	360	371
ACBD4	-0.328916	8.27051e-11	8.55922e-10	360	371
ACBD5	-0.301097	3.26175e-09	2.71091e-08	360	371
ACBD6	0.0481974	0.354574	0.452085	360	371
ACBD7	-0.0262424	0.614369	0.696572	360	369
ACCN1	0.233825	5.3177e-06	2.49856e-05	360	233
ACCN2	0.107551	0.0383962	0.0698119	360	367
ACCN3	-0.0307006	0.55554	0.643795	360	368
ACCN4	0.120575	0.0201743	0.0398762	360	171
ACCN5	-0.124185	0.0167034	0.0338583	360	127
ACCSL	0.0519759	0.318074	0.414541	360	13
ACCS	0.0182927	0.725451	0.789449	360	371
ACD	0.289888	1.29002e-08	9.78665e-08	360	371
ACE2	-0.171762	0.000893982	0.00257294	360	355
ACER1	-0.0566061	0.276814	0.37076	360	108
ACER2	-0.0270928	0.602939	0.686229	360	365
ACER3	0.127995	0.0136176	0.0283331	360	371
ACE	0.237005	3.92035e-06	1.89428e-05	360	371
ACHE	0.14725	0.00448069	0.010707	360	370
ACIN1	0.205402	6.73274e-05	0.000251887	360	371
ACLY	0.134246	0.00963205	0.0208812	360	371
ACMSD	-0.202237	8.75203e-05	0.000318811	360	367
ACN9	-0.19773	0.000126279	0.000444004	360	371
ACO1	-0.309841	1.07037e-09	9.5013e-09	360	371
ACO2	-0.222988	1.45581e-05	6.25596e-05	360	371
ACOT11	0.239815	2.98393e-06	1.47253e-05	360	363
ACOT12	-0.248539	1.2515e-06	6.62038e-06	360	367
ACOT13	-0.403919	5.42575e-16	1.02847e-14	360	371
ACOT1	-0.246671	1.51149e-06	7.87032e-06	360	371
ACOT2	-0.250798	9.93951e-07	5.35465e-06	360	371
ACOT4	-0.20436	7.34284e-05	0.00027223	360	371
ACOT6	-0.290023	1.26934e-08	9.65185e-08	360	370
ACOT7	0.120035	0.0207443	0.0408691	360	371
ACOT8	-0.0458999	0.378007	0.47572	360	371
ACOT9	0.200385	0.000101846	0.000365448	360	371
ACOX1	-0.376081	6.56153e-14	1.00321e-12	360	371
ACOX2	-0.340816	1.52575e-11	1.7479e-10	360	371
ACOX3	-0.0541924	0.297847	0.393587	360	371
ACOXL	0.202342	8.67615e-05	0.00031651	360	233
ACP1	-0.0327954	0.528876	0.620073	360	371
ACP2	-0.0157121	0.762931	0.820243	360	371
ACP5	0.336747	2.74179e-11	3.0447e-10	360	371
ACP6	-0.0995831	0.0553144	0.0957073	360	371
ACPL2	0.0789559	0.129005	0.197059	360	371
ACPP	0.280452	3.92235e-08	2.75339e-07	360	291
ACPT	0.0141428	0.786004	0.838713	360	188
ACRBP	0.158248	0.00223517	0.00577548	360	371
ACRC	0.225347	1.17413e-05	5.14995e-05	360	371
ACRV1	0.155452	0.00267868	0.00679199	360	220
ACR	-0.254637	6.68564e-07	3.71939e-06	360	349
ACSBG1	0.104164	0.0449593	0.0799786	360	350
ACSBG2	0.0769797	0.138893	0.209782	360	172
ACSF2	-0.242822	2.21971e-06	1.12129e-05	360	371
ACSF3	0.0188922	0.716834	0.782208	360	371
ACSL1	-0.280371	3.9593e-08	2.77638e-07	360	371
ACSL3	0.180482	0.000477053	0.00147301	360	371
ACSL4	0.19357	0.000175863	0.000598181	360	371
ACSL5	-0.192899	0.000185399	0.000626725	360	371
ACSL6	-0.242337	2.3288e-06	1.1701e-05	360	369
ACSM1	-0.194757	0.00016012	0.000549702	360	369
ACSM2A	-0.309175	1.16663e-09	1.03067e-08	360	371
ACSM2B	-0.29618	6.00588e-09	4.80712e-08	360	370
ACSM3	-0.17669	0.000629098	0.00188436	360	370
ACSM4	0.0692962	0.182914	0.263334	360	21
ACSM5	-0.272332	9.88456e-08	6.44583e-07	360	371
ACSS1	0.404695	4.71556e-16	8.98979e-15	360	371
ACSS2	-0.256889	5.28262e-07	3.00515e-06	360	371
ACSS3	-0.178016	0.000571464	0.00173046	360	371
ACTA1	0.1091	0.0356764	0.0654824	360	329
ACTA2	0.246142	1.59415e-06	8.26644e-06	360	371
ACTBL2	0.246357	1.55999e-06	8.10806e-06	360	121
ACTB	0.372432	1.19014e-13	1.76807e-12	360	371
ACTC1	0.244829	1.81816e-06	9.31139e-06	360	221
ACTG1	0.329975	7.13622e-11	7.47072e-10	360	371
ACTG2	0.0855967	0.0997292	0.158425	360	371
ACTL6A	0.128185	0.0134775	0.0280857	360	371
ACTL6B	-0.0259877	0.617812	0.6994	360	91
ACTL7A	-0.0510716	0.326578	0.423546	360	21
ACTL7B	0.0419146	0.420842	0.518043	360	85
ACTL8	0.0906502	0.0812035	0.133136	360	199
ACTL9	0.0843262	0.104879	0.165366	360	5
ACTN1	0.24858	1.24626e-06	6.59795e-06	360	371
ACTN2	-0.139974	0.00692762	0.0156583	360	355
ACTN3	0.121948	0.0187867	0.0374889	360	221
ACTN4	0.0462272	0.374611	0.47226	360	371
ACTR10	0.157582	0.00233419	0.00600954	360	371
ACTR1A	0.146186	0.0047814	0.0113304	360	371
ACTR1B	-0.0761769	0.143072	0.214936	360	371
ACTR2	0.168369	0.00113255	0.0031783	360	371
ACTR3B	-0.184308	0.000358804	0.00113697	360	371
ACTR3C	-0.138069	0.0077403	0.0172756	360	371
ACTR3	0.319002	3.20079e-10	3.05539e-09	360	371
ACTR5	0.0196617	0.705824	0.772903	360	371
ACTR6	0.0397029	0.44579	0.541824	360	371
ACTR8	0.21002	4.55864e-05	0.000176412	360	371
ACTRT1	0.104026	0.0452473	0.0804424	360	36
ACVR1B	0.00373062	0.942909	0.960065	360	371
ACVR1C	-0.188079	0.000269492	0.000875968	360	367
ACVR1	0.174711	0.000725278	0.00213838	360	371
ACVR2A	0.106562	0.0402226	0.0727608	360	371
ACVR2B	0.0838106	0.107028	0.168209	360	371
ACVRL1	0.330397	6.72739e-11	7.06873e-10	360	371
ACY1	-0.317517	3.90337e-10	3.67558e-09	360	371
ACY3	-0.211006	4.18969e-05	0.000163596	360	370
ACYP1	0.268061	1.58809e-07	9.95218e-07	360	371
ACYP2	-0.237238	3.83304e-06	1.85479e-05	360	371
ADAD1	0.0141107	0.786478	0.839129	360	30
ADAD2	0.0585746	0.260426	0.352747	360	246
ADAL	-0.329363	7.77162e-11	8.07228e-10	360	371
ADAM10	-0.0351674	0.499488	0.592839	360	371
ADAM11	0.0185151	0.72225	0.78704	360	369
ADAM12	0.376449	6.1765e-14	9.50913e-13	360	369
ADAM15	0.145871	0.00487372	0.0115122	360	371
ADAM17	0.139862	0.00697333	0.0157527	360	371
ADAM18	0.0356826	0.493221	0.586799	360	24
ADAM19	0.349484	4.25318e-12	5.28583e-11	360	371
ADAM20	0.0829257	0.110797	0.173068	360	236
ADAM21P1	-0.130821	0.0116645	0.0246845	360	197
ADAM21	-0.0662449	0.202997	0.287081	360	323
ADAM22	0.186843	0.000296184	0.00095463	360	299
ADAM23	0.202244	8.74701e-05	0.000318687	360	317
ADAM28	0.593324	1.18607e-36	9.84534e-35	360	355
ADAM29	0.190133	0.000230034	0.00075936	360	46
ADAM2	0.0486015	0.35055	0.448072	360	14
ADAM30	-0.0162088	0.755671	0.814474	360	62
ADAM32	0.184318	0.000358543	0.00113632	360	192
ADAM33	0.268872	1.4522e-07	9.16523e-07	360	359
ADAM3A	0.117098	0.0240943	0.0466343	360	5
ADAM5P	-0.0250385	0.630713	0.710671	360	9
ADAM6	0.606685	1.14028e-38	1.11905e-36	360	371
ADAM7	-0.0361436	0.487649	0.581628	360	8
ADAM8	0.572173	1.20649e-33	7.44141e-32	360	371
ADAM9	0.289183	1.40383e-08	1.06097e-07	360	371
ADAMDEC1	0.615431	4.83038e-40	5.34616e-38	360	342
ADAMTS10	0.193033	0.000183451	0.000621619	360	371
ADAMTS12	0.264617	2.31395e-07	1.40845e-06	360	358
ADAMTS13	0.0810561	0.119103	0.183936	360	371
ADAMTS14	0.390604	5.69017e-15	9.82318e-14	360	365
ADAMTS15	0.151597	0.00342195	0.00843089	360	313
ADAMTS16	0.06229	0.231344	0.320058	360	313
ADAMTS17	-0.272254	9.97063e-08	6.49346e-07	360	371
ADAMTS18	0.129594	0.0124802	0.0262074	360	280
ADAMTS19	0.0559818	0.282156	0.376926	360	29
ADAMTS1	0.248938	1.20175e-06	6.38436e-06	360	371
ADAMTS20	0.0840827	0.10589	0.166644	360	108
ADAMTS2	0.324804	1.45844e-10	1.47039e-09	360	370
ADAMTS3	0.373289	1.03548e-13	1.54871e-12	360	343
ADAMTS4	0.162683	0.00166718	0.0044684	360	371
ADAMTS5	0.174717	0.000724977	0.00213838	360	371
ADAMTS6	0.339005	1.98257e-11	2.23524e-10	360	363
ADAMTS7	0.2441	1.9553e-06	9.97783e-06	360	371
ADAMTS8	0.176051	0.000658809	0.00196303	360	360
ADAMTS9	0.299715	3.87656e-09	3.18864e-08	360	371
ADAMTSL1	0.179276	0.000521233	0.00159288	360	370
ADAMTSL2	0.147303	0.00446609	0.0106785	360	371
ADAMTSL3	-0.171951	0.000882143	0.00254549	360	371
ADAMTSL4	-0.271332	1.10525e-07	7.13278e-07	360	371
ADAMTSL5	0.0287483	0.580964	0.667048	360	371
ADAP1	0.411322	1.40244e-16	2.80517e-15	360	371
ADAP2	0.549051	1.34737e-30	6.77837e-29	360	371
ADARB1	0.190395	0.000225419	0.000745856	360	371
ADARB2	0.162943	0.00163835	0.00440059	360	194
ADAR	0.00734454	0.887878	0.919207	360	371
ADAT1	-0.0989656	0.0568506	0.0979658	360	371
ADAT2	0.210319	4.44361e-05	0.000172531	360	371
ADAT3	0.236455	4.13401e-06	1.98884e-05	360	371
ADA	0.378879	4.13503e-14	6.50696e-13	360	371
ADCK1	0.0303131	0.560544	0.648198	360	371
ADCK2	-0.0153935	0.767599	0.824017	360	371
ADCK4	0.0974037	0.0608953	0.103823	360	371
ADCK5	-0.0285338	0.583791	0.66956	360	371
ADCY10	-0.137632	0.00793842	0.0176585	360	366
ADCY1	-0.065528	0.207939	0.292636	360	371
ADCY2	0.285829	2.09201e-08	1.54179e-07	360	155
ADCY3	0.365087	3.8571e-13	5.39614e-12	360	371
ADCY4	0.201608	9.21536e-05	0.000333858	360	371
ADCY5	0.24124	2.59489e-06	1.29465e-05	360	357
ADCY6	0.0526599	0.311739	0.408368	360	371
ADCY7	0.557475	1.11315e-31	5.99354e-30	360	371
ADCY8	-0.0768049	0.139795	0.210968	360	173
ADCY9	-0.150889	0.00357729	0.00877238	360	371
ADCYAP1R1	-0.0908765	0.0804437	0.13201	360	101
ADCYAP1	0.177834	0.000579046	0.00175156	360	284
ADC	0.104006	0.0452891	0.0804811	360	371
ADD1	0.0215396	0.679218	0.750867	360	371
ADD2	0.44356	2.58184e-19	6.51907e-18	360	340
ADD3	0.247277	1.422e-06	7.43937e-06	360	371
ADH1A	-0.206386	6.19988e-05	0.000233729	360	371
ADH1B	-0.270096	1.26832e-07	8.09596e-07	360	371
ADH1C	-0.152794	0.00317326	0.00789037	360	371
ADH4	-0.190549	0.000222739	0.000738462	360	371
ADH5	-0.198451	0.000119144	0.000421461	360	371
ADH6	-0.2527	8.17371e-07	4.47477e-06	360	371
ADH7	-0.172336	0.000858551	0.00248751	360	227
ADHFE1	-0.300316	3.59672e-09	2.97319e-08	360	371
ADI1	-0.334875	3.57978e-11	3.91634e-10	360	371
ADIG	-0.0519822	0.318015	0.414491	360	205
ADIPOQ	-0.0587816	0.258742	0.351015	360	71
ADIPOR1	-0.275917	6.59722e-08	4.44771e-07	360	371
ADIPOR2	-0.251124	9.6133e-07	5.19296e-06	360	371
ADK	-0.230556	7.243e-06	3.29742e-05	360	371
ADM2	0.134881	0.00929217	0.0202581	360	370
ADM	0.113101	0.0293974	0.0553811	360	371
ADNP2	0.0597813	0.250716	0.342108	360	371
ADNP	-0.000716692	0.989023	0.992411	360	371
ADORA1	0.218143	2.24805e-05	9.34982e-05	360	365
ADORA2A	0.296623	5.6867e-09	4.56081e-08	360	371
ADORA2B	0.281019	3.67315e-08	2.59768e-07	360	367
ADORA3	0.457504	1.36648e-20	3.79681e-19	360	371
ADO	0.360428	8.00866e-13	1.0744e-11	360	371
ADPGK	0.277891	5.26723e-08	3.60721e-07	360	371
ADPRHL1	-0.0470417	0.366245	0.463865	360	371
ADPRHL2	0.278888	4.69755e-08	3.24496e-07	360	371
ADPRH	0.333217	4.52736e-11	4.87799e-10	360	371
ADRA1A	-0.240117	2.89694e-06	1.43422e-05	360	349
ADRA1B	-0.140206	0.00683427	0.0154701	360	371
ADRA1D	0.0799655	0.124169	0.190556	360	326
ADRA2A	0.440112	5.23077e-19	1.2897e-17	360	363
ADRA2B	-0.12027	0.0204946	0.0404172	360	371
ADRA2C	0.115191	0.0265112	0.050609	360	368
ADRB1	-0.158422	0.00220987	0.00571753	360	341
ADRB2	-0.236533	4.10298e-06	1.97582e-05	360	371
ADRB3	0.173887	0.000769188	0.00225349	360	118
ADRBK1	0.320152	2.74272e-10	2.64474e-09	360	371
ADRBK2	0.247475	1.39376e-06	7.30887e-06	360	371
ADRM1	0.0237444	0.648483	0.725251	360	371
ADSL	0.151502	0.00344237	0.00847491	360	371
ADSSL1	-0.231247	6.78769e-06	3.11218e-05	360	371
ADSS	0.0524085	0.314058	0.410704	360	371
AEBP1	0.36856	2.2204e-13	3.18924e-12	360	371
AEBP2	0.17137	0.000918985	0.0026369	360	371
AEN	0.10101	0.0518948	0.0905216	360	371
AES	0.140361	0.00677234	0.0153439	360	371
AFAP1L1	0.23243	6.07034e-06	2.81633e-05	360	371
AFAP1L2	0.34723	5.95153e-12	7.2562e-11	360	371
AFAP1	0.346103	7.03236e-12	8.49082e-11	360	371
AFARP1	-0.259747	3.90496e-07	2.2807e-06	360	353
AFF1	0.0130616	0.80201	0.851143	360	371
AFF2	0.0363423	0.485258	0.579506	360	293
AFF3	0.196429	0.000140156	0.000487208	360	370
AFF4	-0.0805486	0.12144	0.186953	360	371
AFG3L1	0.199635	0.000108254	0.00038691	360	371
AFG3L2	-0.133484	0.010055	0.0216746	360	371
AFMID	-0.254467	6.80556e-07	3.78083e-06	360	371
AFM	-0.192515	0.00019107	0.00064353	360	370
AFP	0.22796	9.22757e-06	4.12641e-05	360	366
AFTPH	0.0725391	0.16322	0.239816	360	371
AG2	0.316943	4.21369e-10	3.95222e-09	360	371
AGAP11	-0.0102515	0.843986	0.884569	360	347
AGAP1	0.0686084	0.187308	0.268669	360	371
AGAP2	0.354228	2.07859e-12	2.67677e-11	360	371
AGAP3	0.0376967	0.469129	0.563792	360	371
AGAP4	0.0843183	0.104912	0.165405	360	371
AGAP5	-0.0411444	0.429435	0.526086	360	369
AGAP6	0.0810436	0.11916	0.18401	360	371
AGAP7	0.095254	0.0668474	0.112592	360	370
AGAP8	0.0703192	0.176521	0.255793	360	368
AGA	0.136008	0.00871452	0.0191644	360	371
AGBL1	0.105394	0.0424748	0.0762258	360	15
AGBL2	-0.0706942	0.174219	0.253065	360	368
AGBL3	0.0655446	0.207823	0.292494	360	368
AGBL4	0.104737	0.0437868	0.0781961	360	229
AGBL5	-0.0534099	0.304887	0.401107	360	371
AGER	0.296738	5.60682e-09	4.50036e-08	360	371
AGFG1	0.176886	0.00062027	0.00186184	360	371
AGFG2	-0.0906852	0.0810856	0.132954	360	371
AGGF1	-0.178094	0.000568217	0.0017222	360	371
AGK	0.0352951	0.497932	0.59136	360	371
AGL	-0.293725	8.11141e-09	6.36203e-08	360	371
AGMAT	-0.245606	1.68213e-06	8.68848e-06	360	371
AGPAT1	-0.141666	0.00627088	0.0143744	360	371
AGPAT2	0.11563	0.025937	0.0496986	360	371
AGPAT3	-0.226466	1.05935e-05	4.68237e-05	360	371
AGPAT4	0.297113	5.35344e-09	4.30914e-08	360	371
AGPAT5	0.0883006	0.0894381	0.144473	360	371
AGPAT6	-0.0505822	0.331242	0.428256	360	371
AGPAT9	-0.0493524	0.343148	0.440732	360	371
AGPHD1	-0.257742	4.82863e-07	2.76903e-06	360	371
AGPS	0.111136	0.0323514	0.0602284	360	371
AGR2	0.233857	5.30171e-06	2.49164e-05	360	241
AGR3	0.191562	0.000205851	0.000689238	360	88
AGRN	0.295792	6.29899e-09	5.01753e-08	360	371
AGRP	-0.0169677	0.744619	0.805337	360	200
AGTPBP1	0.142436	0.00599108	0.0138078	360	371
AGTR1	-0.0259928	0.617743	0.6994	360	371
AGTR2	-0.0223094	0.668423	0.742022	360	82
AGTRAP	0.252792	8.09586e-07	4.43458e-06	360	371
AGT	-0.192953	0.000184607	0.000624511	360	371
AGXT2L1	-0.254208	6.99146e-07	3.87761e-06	360	366
AGXT2L2	-0.134736	0.00936877	0.0203934	360	371
AGXT2	-0.166072	0.00132597	0.00364812	360	368
AGXT	-0.27216	1.00768e-07	6.54978e-07	360	370
AHCTF1	-0.157293	0.00237853	0.00610922	360	371
AHCYL1	-0.0464365	0.37245	0.470004	360	371
AHCYL2	-0.161207	0.00183954	0.00487136	360	371
AHCY	-0.104698	0.0438675	0.078295	360	371
AHDC1	0.150181	0.00373888	0.00911963	360	371
AHI1	0.0752722	0.147895	0.221166	360	371
AHNAK2	0.271969	1.02937e-07	6.67765e-07	360	368
AHNAK	0.0171448	0.742048	0.803297	360	371
AHRR	0.102664	0.0481539	0.0849033	360	368
AHR	-0.0602247	0.247213	0.338184	360	371
AHSA1	0.185373	0.000331134	0.00105685	360	371
AHSA2	0.0477493	0.359072	0.456592	360	371
AHSG	-0.185731	0.000322288	0.00103143	360	371
AHSP	0.0694911	0.181683	0.261921	360	155
AICDA	0.391732	4.68193e-15	8.14615e-14	360	97
AIDA	0.0608672	0.242197	0.332647	360	371
AIF1L	0.0421551	0.418179	0.515778	360	371
AIF1	0.643513	9.33671e-45	1.77149e-42	360	371
AIFM1	-0.165964	0.00133573	0.00366989	360	371
AIFM2	-0.0441737	0.396222	0.494644	360	371
AIFM3	0.0180102	0.729524	0.792628	360	370
AIG1	-0.261675	3.17811e-07	1.88772e-06	360	371
AIM1L	0.0306896	0.555681	0.643921	360	366
AIM1	0.142643	0.00591741	0.0136585	360	371
AIM2	0.633382	5.3323e-43	7.8689e-41	360	334
AIMP1	0.109368	0.0352236	0.0647466	360	371
AIMP2	-0.194638	0.00016163	0.000554217	360	371
AIPL1	0.0671686	0.196755	0.279683	360	40
AIP	0.130598	0.0118094	0.0249514	360	371
AIRE	0.111253	0.0321689	0.059928	360	142
AJAP1	0.279671	4.29283e-08	2.98922e-07	360	277
AK1	0.0405914	0.435669	0.531923	360	371
AK2	-0.0319138	0.540019	0.629948	360	371
AK3L1	-0.00724925	0.889323	0.92032	360	371
AK3	-0.241119	2.62581e-06	1.30877e-05	360	371
AK5	0.268794	1.46489e-07	9.23825e-07	360	231
AK7	-0.0375456	0.470914	0.565699	360	366
AKAP10	-0.0380706	0.464729	0.559787	360	370
AKAP11	0.019238	0.711879	0.778122	360	371
AKAP12	0.0312704	0.548223	0.63721	360	371
AKAP13	-0.054717	0.293187	0.388848	360	371
AKAP14	-0.039194	0.451647	0.547673	360	135
AKAP1	-0.273464	8.70553e-08	5.73897e-07	360	371
AKAP2	-0.0323964	0.533905	0.624389	360	346
AKAP3	-0.0869959	0.0942921	0.150979	360	358
AKAP4	0.0830446	0.110285	0.172388	360	26
AKAP5	0.293456	8.38096e-09	6.55538e-08	360	371
AKAP6	-0.267944	1.60874e-07	1.00657e-06	360	370
AKAP7	0.0969533	0.0621046	0.105594	360	371
AKAP8L	0.242055	2.39469e-06	1.20078e-05	360	371
AKAP8	0.240253	2.85866e-06	1.41738e-05	360	371
AKAP9	-0.0652416	0.209938	0.294991	360	371
AKD1	0.0169712	0.744569	0.805326	360	371
AKIRIN1	0.118647	0.0222737	0.0435207	360	371
AKIRIN2	-0.0397914	0.444776	0.540987	360	371
AKNAD1	0.0971024	0.061702	0.105008	360	82
AKNA	0.464433	3.01437e-21	8.74124e-20	360	371
AKR1A1	-0.156382	0.00252298	0.00643653	360	371
AKR1B10	0.120749	0.0199937	0.0395828	360	365
AKR1B15	0.0751794	0.148397	0.221766	360	290
AKR1B1	0.357346	1.29002e-12	1.69078e-11	360	371
AKR1C1	-0.0485767	0.350796	0.448261	360	371
AKR1C2	-0.131781	0.0110598	0.0235474	360	371
AKR1C3	-0.017252	0.740493	0.801963	360	371
AKR1C4	-0.0983496	0.0584184	0.100277	360	370
AKR1CL1	-0.191388	0.000208665	0.000697717	360	315
AKR1D1	-0.100789	0.0524138	0.091323	360	368
AKR1E2	0.154845	0.00278508	0.00703491	360	347
AKR7A2	-0.16295	0.00163761	0.0043992	360	371
AKR7A3	-0.219112	2.06256e-05	8.63062e-05	360	371
AKR7L	-0.225186	1.19158e-05	5.21958e-05	360	371
AKT1S1	0.0228867	0.660372	0.734927	360	371
AKT1	0.0234658	0.652335	0.728098	360	371
AKT2	-0.239622	3.04065e-06	1.49792e-05	360	371
AKT3	0.218403	2.19674e-05	9.1536e-05	360	371
AKTIP	-0.0131933	0.800056	0.849657	360	371
ALAD	-0.383193	2.01163e-14	3.27952e-13	360	371
ALAS1	-0.268349	1.53857e-07	9.6651e-07	360	371
ALAS2	0.00302158	0.953746	0.967342	360	247
ALB	-0.106423	0.0404864	0.073165	360	371
ALCAM	0.145723	0.00491759	0.0116035	360	371
ALDH16A1	0.147851	0.00431847	0.0103666	360	371
ALDH18A1	0.170118	0.00100306	0.00285106	360	371
ALDH1A1	-0.260522	3.59518e-07	2.1134e-06	360	371
ALDH1A2	0.141436	0.00635669	0.0145427	360	369
ALDH1A3	0.223353	1.40843e-05	6.07726e-05	360	363
ALDH1B1	-0.164687	0.00145685	0.00396849	360	371
ALDH1L1	-0.23992	2.95346e-06	1.4593e-05	360	371
ALDH1L2	0.319369	3.04704e-10	2.91842e-09	360	369
ALDH2	-0.362803	5.52673e-13	7.54651e-12	360	371
ALDH3A1	-0.0592681	0.254815	0.346631	360	358
ALDH3A2	-0.324511	1.51798e-10	1.52425e-09	360	371
ALDH3B1	0.285372	2.20776e-08	1.61702e-07	360	371
ALDH3B2	0.109567	0.034889	0.0642294	360	238
ALDH4A1	-0.199463	0.000109778	0.000391937	360	371
ALDH5A1	-0.446379	1.44083e-19	3.723e-18	360	371
ALDH6A1	-0.352568	2.67407e-12	3.39751e-11	360	371
ALDH7A1	-0.34129	1.42414e-11	1.64284e-10	360	371
ALDH8A1	-0.159753	0.00202514	0.00529808	360	371
ALDH9A1	-0.355761	1.64505e-12	2.13224e-11	360	371
ALDOA	0.249065	1.18627e-06	6.30548e-06	360	371
ALDOB	-0.242019	2.4032e-06	1.20474e-05	360	371
ALDOC	-0.0984973	0.0580392	0.0997204	360	371
ALG10B	-0.0488588	0.348002	0.445445	360	371
ALG10	-0.0816974	0.116201	0.179998	360	371
ALG11	0.198544	0.000118259	0.000418618	360	371
ALG12	-0.0955064	0.0661247	0.111533	360	371
ALG13	-0.0547289	0.293082	0.388734	360	371
ALG14	-0.130652	0.0117738	0.0248867	360	371
ALG1L2	0.0517661	0.320034	0.416768	360	60
ALG1L	-0.0916736	0.0778136	0.128254	360	369
ALG1	-0.0492849	0.343809	0.441382	360	371
ALG2	-0.0981229	0.0590044	0.1011	360	371
ALG3	0.0191914	0.712546	0.778808	360	371
ALG5	-0.0225932	0.664461	0.738364	360	371
ALG6	0.0019838	0.969622	0.979207	360	371
ALG8	-0.242998	2.18139e-06	1.10383e-05	360	371
ALG9	-0.147874	0.00431246	0.0103534	360	371
ALKBH1	0.107443	0.0385922	0.0701235	360	371
ALKBH2	-0.152741	0.00318403	0.00791518	360	371
ALKBH3	0.0461923	0.374972	0.472618	360	371
ALKBH4	0.010766	0.836264	0.878808	360	371
ALKBH5	-0.16594	0.00133798	0.00367556	360	371
ALKBH6	-0.0734591	0.157933	0.233308	360	371
ALKBH7	-0.13421	0.00965157	0.0209089	360	371
ALKBH8	0.0578671	0.266237	0.358886	360	371
ALK	0.217553	2.36868e-05	9.7943e-05	360	195
ALLC	0.134367	0.00956662	0.0207588	360	249
ALMS1P	0.0881548	0.0899703	0.145203	360	321
ALMS1	0.00679297	0.896249	0.925612	360	371
ALOX12B	0.141329	0.00639719	0.0146145	360	95
ALOX12P2	-0.0399907	0.442497	0.538807	360	351
ALOX12	0.0788938	0.129307	0.197445	360	351
ALOX15B	0.191316	0.000209838	0.000700467	360	349
ALOX15	0.0137324	0.79207	0.843378	360	312
ALOX5AP	0.684035	1.68657e-52	9.59995e-50	360	371
ALOX5	0.523256	1.82621e-27	7.97846e-26	360	371
ALOXE3	0.219356	2.01817e-05	8.45728e-05	360	140
ALPI	0.0358996	0.490594	0.584128	360	228
ALPK1	0.227909	9.2712e-06	4.14313e-05	360	371
ALPK2	0.0579448	0.265595	0.358117	360	371
ALPK3	0.0323038	0.535076	0.62539	360	371
ALPL	-0.127017	0.0143577	0.0296747	360	371
ALPPL2	-0.0687769	0.186224	0.267268	360	73
ALPP	0.00350992	0.946281	0.962416	360	93
ALS2CL	-0.0658962	0.20539	0.289765	360	371
ALS2CR11	0.0410527	0.430466	0.527025	360	282
ALS2CR12	0.0201459	0.698928	0.76763	360	298
ALS2CR4	0.205107	6.90052e-05	0.000257198	360	371
ALS2CR8	-0.124011	0.0168577	0.03413	360	371
ALS2	-0.106752	0.0398662	0.072175	360	371
ALX1	0.0973889	0.0609346	0.10388	360	70
ALX3	-0.000495547	0.99241	0.994807	360	359
ALX4	0.0236688	0.649527	0.7259	360	46
AMAC1L2	0.17729	0.000602397	0.00181553	360	190
AMAC1L3	-0.0238609	0.646875	0.723869	360	70
AMAC1	0.0235251	0.651514	0.727508	360	41
AMACR	-0.322849	1.90428e-10	1.87816e-09	360	371
AMBN	0.140367	0.00676989	0.0153401	360	112
AMBP	-0.194695	0.000160908	0.000552024	360	371
AMBRA1	-0.119018	0.0218555	0.0428128	360	371
AMD1	0.263154	2.71074e-07	1.63251e-06	360	371
AMDHD1	-0.265422	2.12005e-07	1.29876e-06	360	371
AMDHD2	-0.000612474	0.990619	0.993512	360	371
AMELX	-0.0923399	0.075669	0.125195	360	19
AMELY	-0.0723488	0.164329	0.24125	360	36
AMFR	-0.206168	6.31429e-05	0.00023766	360	371
AMHR2	0.164695	0.00145599	0.00396694	360	166
AMH	0.0490047	0.346562	0.443944	360	302
AMICA1	0.541256	1.27235e-29	6.04958e-28	360	371
AMIGO1	-0.0430874	0.40795	0.505988	360	370
AMIGO2	0.342195	1.24844e-11	1.45361e-10	360	371
AMIGO3	0.052894	0.30959	0.406033	360	371
AMMECR1L	0.0261358	0.61581	0.697649	360	371
AMMECR1	0.209489	4.76959e-05	0.00018404	360	371
AMN1	-0.0024413	0.962622	0.974115	360	371
AMN	0.0172014	0.741227	0.80267	360	366
AMOTL1	0.0984357	0.0581971	0.0999571	360	371
AMOTL2	0.00756666	0.88451	0.916626	360	371
AMOT	-0.0339025	0.515052	0.607332	360	370
AMPD1	0.452815	3.72652e-20	1.00869e-18	360	129
AMPD2	-0.0584594	0.261365	0.353635	360	371
AMPD3	0.514292	1.94398e-26	7.83966e-25	360	371
AMPH	0.278008	5.19685e-08	3.56391e-07	360	317
AMTN	0.121095	0.0196386	0.0389682	360	29
AMT	-0.215613	2.80989e-05	0.000114242	360	371
AMY1A	-0.116019	0.0254372	0.0488772	360	349
AMY2A	-0.101626	0.050475	0.0883779	360	308
AMY2B	-0.154401	0.00286531	0.00721287	360	371
AMZ1	0.134858	0.00930413	0.0202775	360	329
AMZ2P1	0.0623517	0.230881	0.319485	360	371
AMZ2	0.0696801	0.180495	0.260491	360	371
ANAPC10	0.0388838	0.455238	0.551088	360	371
ANAPC11	0.0237315	0.648661	0.725297	360	371
ANAPC13	-0.0352341	0.498675	0.59205	360	371
ANAPC16	-0.000189944	0.997091	0.997942	360	371
ANAPC1	0.045754	0.379526	0.47739	360	371
ANAPC2	-0.1324	0.0106844	0.0228335	360	371
ANAPC4	0.10065	0.0527417	0.0918301	360	371
ANAPC5	0.1098	0.0345022	0.0636439	360	371
ANAPC7	0.141925	0.00617534	0.0141832	360	371
ANGEL1	0.0392038	0.451534	0.547602	360	371
ANGEL2	-0.146217	0.0047722	0.0113181	360	371
ANGPT1	0.144094	0.00542565	0.0126332	360	366
ANGPT2	0.0286005	0.58291	0.668821	360	371
ANGPT4	-0.0489034	0.347561	0.445023	360	145
ANGPTL1	0.0456288	0.380832	0.478792	360	371
ANGPTL2	0.235653	4.46514e-06	2.13679e-05	360	371
ANGPTL3	-0.226096	1.09609e-05	4.8321e-05	360	371
ANGPTL4	-0.147334	0.00445781	0.01066	360	371
ANGPTL5	0.049614	0.340592	0.438027	360	42
ANGPTL6	-0.0137951	0.791142	0.842886	360	369
ANGPTL7	-0.0713516	0.170238	0.248442	360	116
ANG	-0.208595	5.14597e-05	0.000196961	360	371
ANK1	0.388291	8.46832e-15	1.44688e-13	360	345
ANK2	0.41738	4.51916e-17	9.50695e-16	360	370
ANK3	0.274242	7.97461e-08	5.29567e-07	360	370
ANKAR	-0.0821595	0.114144	0.177253	360	370
ANKDD1A	0.42606	8.56627e-18	1.92833e-16	360	371
ANKFN1	-0.104712	0.0438376	0.0782556	360	114
ANKFY1	0.0598146	0.250452	0.341874	360	371
ANKHD1-EIF4EBP3	0.0183182	0.725085	0.789242	360	371
ANKHD1	-0.27553	6.89331e-08	4.63165e-07	360	371
ANKH	-0.0336976	0.517596	0.609502	360	371
ANKIB1	0.0656641	0.206994	0.291512	360	371
ANKK1	0.0874876	0.0924389	0.148609	360	304
ANKLE1	0.290603	1.1838e-08	9.07415e-08	360	365
ANKLE2	0.23368	5.39194e-06	2.52987e-05	360	371
ANKMY1	0.0107662	0.836261	0.878808	360	371
ANKMY2	0.000505956	0.992251	0.994697	360	371
ANKRA2	-0.239166	3.17886e-06	1.56176e-05	360	371
ANKRD10	0.164765	0.00144909	0.00395084	360	371
ANKRD11	0.155187	0.0027246	0.00689527	360	371
ANKRD12	0.0634718	0.222595	0.309999	360	371
ANKRD13A	0.179788	0.000502027	0.00154081	360	371
ANKRD13B	0.322509	1.99436e-10	1.95818e-09	360	371
ANKRD13C	0.0264052	0.612174	0.694794	360	371
ANKRD13D	0.491595	5.71852e-24	2.01636e-22	360	371
ANKRD16	-0.0480598	0.355951	0.453376	360	371
ANKRD17	-0.109911	0.0343186	0.063352	360	371
ANKRD19	0.14502	0.00513133	0.0120436	360	371
ANKRD1	0.238556	3.37348e-06	1.64802e-05	360	350
ANKRD20A3	-0.0175669	0.735931	0.798455	360	330
ANKRD20A4	-0.00573143	0.912391	0.936935	360	196
ANKRD20B	-0.0774267	0.136607	0.206752	360	340
ANKRD22	0.411248	1.42172e-16	2.84086e-15	360	363
ANKRD23	0.0557787	0.283908	0.378632	360	371
ANKRD24	-0.243084	2.16283e-06	1.09471e-05	360	371
ANKRD26P1	0.0570551	0.273016	0.366461	360	93
ANKRD26	-0.0533605	0.305336	0.401512	360	371
ANKRD27	0.160808	0.0018888	0.0049832	360	371
ANKRD28	-0.12161	0.0191202	0.0380647	360	371
ANKRD29	-0.133319	0.0101483	0.0218472	360	370
ANKRD2	0.0119737	0.818201	0.864696	360	290
ANKRD30A	0.0639622	0.219034	0.305895	360	59
ANKRD30B	0.136162	0.0086383	0.0190136	360	70
ANKRD31	-0.145976	0.00484261	0.0114518	360	180
ANKRD32	0.0823875	0.11314	0.176037	360	371
ANKRD33	0.00683698	0.89558	0.925354	360	213
ANKRD34A	0.126189	0.0150119	0.0308063	360	370
ANKRD34B	-0.0259679	0.61808	0.699625	360	134
ANKRD34C	-0.00341948	0.947663	0.96333	360	109
ANKRD35	0.00703986	0.8925	0.922937	360	359
ANKRD36BP1	-0.0975353	0.0605455	0.103327	360	360
ANKRD36B	0.141764	0.00623455	0.0143027	360	337
ANKRD36	0.227258	9.84764e-06	4.38402e-05	360	371
ANKRD37	-0.0548977	0.291594	0.386992	360	371
ANKRD39	-0.0344971	0.507705	0.60019	360	371
ANKRD40	-0.0158751	0.760547	0.81821	360	371
ANKRD42	-0.0347567	0.504514	0.5977	360	371
ANKRD43	-0.172126	0.000871344	0.0025198	360	370
ANKRD44	0.218239	2.22907e-05	9.2767e-05	360	370
ANKRD45	0.116032	0.0254207	0.048855	360	339
ANKRD46	-0.169001	0.00108409	0.0030565	360	371
ANKRD49	0.0780763	0.133337	0.202476	360	371
ANKRD50	-0.0943265	0.0695587	0.116476	360	371
ANKRD52	0.139999	0.00691746	0.0156389	360	371
ANKRD53	0.0742525	0.153479	0.22774	360	342
ANKRD54	0.00818968	0.875076	0.909404	360	371
ANKRD55	0.295897	6.21816e-09	4.96505e-08	360	337
ANKRD56	-0.283578	2.72615e-08	1.96279e-07	360	368
ANKRD57	-0.221448	1.67322e-05	7.12416e-05	360	371
ANKRD58	0.481695	5.99221e-23	1.97972e-21	360	370
ANKRD5	-0.129923	0.0122565	0.0257895	360	371
ANKRD6	0.116366	0.0249984	0.0481874	360	371
ANKRD7	0.156188	0.00255478	0.00651098	360	107
ANKRD9	-0.133473	0.0100611	0.0216854	360	371
ANKS1A	0.0785579	0.130951	0.199394	360	371
ANKS1B	-0.0508189	0.328981	0.425914	360	333
ANKS3	0.244309	1.91487e-06	9.77903e-06	360	371
ANKS4B	-0.197546	0.000128161	0.000449987	360	366
ANKS6	0.207923	5.44742e-05	0.000207502	360	370
ANKZF1	0.162234	0.00171803	0.00458617	360	371
ANLN	0.156414	0.00251779	0.00642623	360	371
ANO10	0.0785906	0.130791	0.199252	360	371
ANO1	-0.217035	2.47967e-05	0.000102235	360	371
ANO2	0.115062	0.0266818	0.0508763	360	359
ANO3	0.018749	0.718889	0.784235	360	322
ANO4	0.308616	1.25403e-09	1.10202e-08	360	297
ANO5	0.0382716	0.462373	0.557759	360	359
ANO6	-0.250212	1.05545e-06	5.65995e-06	360	371
ANO7	0.120816	0.0199252	0.03947	360	371
ANO8	-0.109206	0.0354962	0.0652005	360	371
ANO9	0.575125	4.72961e-34	2.99122e-32	360	366
ANP32A	0.232623	5.96069e-06	2.76914e-05	360	371
ANP32B	0.265105	2.19457e-07	1.34152e-06	360	371
ANP32C	0.116845	0.0244041	0.0471881	360	329
ANP32D	0.107104	0.0392129	0.0711022	360	53
ANP32E	0.0488819	0.347774	0.445209	360	371
ANPEP	-0.0578614	0.266284	0.358925	360	371
ANTXR1	0.358724	1.04299e-12	1.38246e-11	360	371
ANTXR2	0.201945	8.96412e-05	0.000325703	360	371
ANTXRL	0.0243496	0.640147	0.718561	360	21
ANUBL1	-0.127438	0.014035	0.0290862	360	371
ANXA10	-0.211926	3.87104e-05	0.000152469	360	369
ANXA11	0.199088	0.00011316	0.000402897	360	371
ANXA13	0.272709	9.475e-08	6.20312e-07	360	364
ANXA1	0.419498	3.02517e-17	6.46645e-16	360	371
ANXA2P1	0.266308	1.92479e-07	1.18901e-06	360	371
ANXA2P2	0.325201	1.38113e-10	1.39599e-09	360	371
ANXA2P3	0.253575	7.46563e-07	4.12109e-06	360	330
ANXA2	0.366043	3.31574e-13	4.67158e-12	360	371
ANXA3	0.271797	1.04938e-07	6.7964e-07	360	359
ANXA4	0.246711	1.50541e-06	7.84278e-06	360	371
ANXA5	0.42064	2.43367e-17	5.28143e-16	360	371
ANXA6	-0.23718	3.85476e-06	1.8644e-05	360	371
ANXA7	-0.171814	0.000890704	0.00256573	360	371
ANXA8L1	0.0744731	0.152258	0.226224	360	14
ANXA8L2	0.148138	0.00424305	0.0102077	360	305
ANXA8	0.282418	3.12164e-08	2.22821e-07	360	281
ANXA9	-0.130509	0.011867	0.0250625	360	371
AOAH	0.64341	9.73524e-45	1.82967e-42	360	371
AOC2	-0.106171	0.0409666	0.0739053	360	370
AOC3	0.017336	0.739276	0.800949	360	371
AOX1	-0.127834	0.0137368	0.028565	360	371
AOX2P	-0.0788737	0.129405	0.197519	360	139
AP1AR	-0.137738	0.00789001	0.0175625	360	371
AP1B1	0.146955	0.00456241	0.0108853	360	371
AP1G1	-0.0546714	0.293591	0.389253	360	371
AP1G2	0.351266	3.25483e-12	4.09878e-11	360	371
AP1M1	-0.088329	0.0893346	0.144364	360	371
AP1M2	0.14275	0.00587987	0.0135845	360	336
AP1S1	-0.0231009	0.657395	0.732351	360	371
AP1S2	0.470429	7.92681e-22	2.41096e-20	360	371
AP1S3	0.151175	0.00351374	0.00863142	360	371
AP2A1	0.0153446	0.768317	0.824432	360	371
AP2A2	0.104291	0.0446981	0.0796045	360	371
AP2B1	0.0683627	0.188896	0.270422	360	371
AP2M1	0.168322	0.00113623	0.00318683	360	371
AP2S1	0.166218	0.00131285	0.00361553	360	371
AP3B1	-0.0227526	0.662239	0.736429	360	371
AP3B2	0.1501	0.00375774	0.00915851	360	185
AP3D1	0.0391709	0.451914	0.54793	360	371
AP3M1	0.0325043	0.532543	0.623197	360	371
AP3M2	0.230216	7.4776e-06	3.39331e-05	360	371
AP3S1	-0.0842332	0.105264	0.165855	360	371
AP3S2	-0.228809	8.52773e-06	3.83671e-05	360	371
AP4B1	0.221508	1.66417e-05	7.09319e-05	360	371
AP4E1	0.00607185	0.90721	0.932919	360	371
AP4M1	0.261198	3.34473e-07	1.97667e-06	360	371
AP4S1	0.0412436	0.428323	0.525326	360	371
APAF1	0.0948303	0.068075	0.114387	360	371
APBA1	-0.294918	7.01167e-09	5.54972e-08	360	371
APBA2	0.403866	5.47749e-16	1.03729e-14	360	366
APBA3	-0.0228797	0.66047	0.734972	360	371
APBB1IP	0.190807	0.000218309	0.000725221	360	371
APBB1	0.193998	0.000170027	0.00058061	360	371
APBB2	-0.110144	0.0339371	0.0627351	360	371
APBB3	-0.284252	2.51887e-08	1.82808e-07	360	371
APC2	0.0695119	0.181552	0.261789	360	370
APCDD1L	0.295855	6.25092e-09	4.98123e-08	360	177
APCDD1	0.23365	5.40731e-06	2.53589e-05	360	370
APCS	-0.0515933	0.321654	0.418421	360	371
APC	-0.1648	0.00144572	0.00394327	360	371
APEH	-0.156898	0.00244023	0.00624702	360	371
APEX1	0.0596311	0.251911	0.343371	360	371
APEX2	0.120843	0.019897	0.039422	360	371
APH1A	-0.140368	0.00676955	0.0153401	360	371
APH1B	0.322967	1.874e-10	1.85096e-09	360	371
API5	-0.115281	0.0263932	0.0504127	360	371
APIP	-0.0460309	0.376645	0.474295	360	371
APITD1	-0.0382407	0.462735	0.557959	360	371
APLF	-0.018573	0.721418	0.786278	360	371
APLNR	0.23682	3.99107e-06	1.92658e-05	360	371
APLN	-0.135006	0.00922649	0.0201215	360	371
APLP1	0.174389	0.00074211	0.0021838	360	367
APLP2	-0.0851669	0.101448	0.160707	360	371
APOA1BP	-0.00115376	0.98233	0.988183	360	371
APOA1	-0.0778223	0.134608	0.204146	360	371
APOA2	-0.186331	0.000307933	0.000989298	360	371
APOA4	0.105121	0.0430156	0.0770437	360	361
APOA5	-0.280246	4.01695e-08	2.81582e-07	360	371
APOB48R	0.584475	2.28638e-35	1.68078e-33	360	371
APOBEC1	0.0899794	0.0834893	0.136356	360	27
APOBEC2	0.143776	0.00553038	0.01285	360	342
APOBEC3A	0.324572	1.50545e-10	1.51319e-09	360	356
APOBEC3B	0.0889074	0.0872497	0.141569	360	362
APOBEC3C	0.564651	1.25749e-32	7.26136e-31	360	371
APOBEC3D	0.514558	1.81399e-26	7.3303e-25	360	371
APOBEC3F	0.318068	3.62701e-10	3.42939e-09	360	371
APOBEC3G	0.579482	1.16693e-34	7.74921e-33	360	371
APOBEC3H	0.497474	1.36579e-24	4.97428e-23	360	362
APOBEC4	0.0175614	0.73601	0.798476	360	53
APOB	-0.250431	1.03202e-06	5.54474e-06	360	371
APOC1P1	-0.116237	0.0251609	0.0484585	360	367
APOC1	-0.198878	0.000115109	0.000408842	360	371
APOC2	-0.199329	0.000110973	0.000395493	360	371
APOC3	-0.241088	2.63385e-06	1.31245e-05	360	371
APOC4	-0.331534	5.73757e-11	6.09296e-10	360	371
APOD	0.217328	2.41627e-05	9.97864e-05	360	369
APOE	-0.248811	1.21735e-06	6.46034e-06	360	371
APOF	-0.190174	0.000229311	0.000757224	360	370
APOH	-0.188362	0.000263704	0.000858979	360	371
APOL1	0.103431	0.0464973	0.0824127	360	371
APOL2	0.153019	0.00312848	0.00779557	360	371
APOL3	0.157881	0.00228931	0.00590236	360	371
APOL4	0.38762	9.49763e-15	1.61443e-13	360	371
APOL5	-0.167307	0.00121847	0.00338364	360	278
APOL6	-0.0295825	0.570035	0.656961	360	371
APOLD1	-0.0126478	0.808159	0.856437	360	371
APOM	-0.133958	0.0097899	0.0211695	360	371
APOOL	-0.220347	1.84715e-05	7.79638e-05	360	371
APOO	-0.0348398	0.503495	0.596705	360	371
APPBP2	-0.0114779	0.825606	0.870066	360	371
APPL1	0.00543135	0.916961	0.94047	360	371
APPL2	0.0948193	0.068107	0.114409	360	371
APP	0.144101	0.00542356	0.0126298	360	371
APRT	0.0804867	0.121728	0.187335	360	371
APTX	0.00296396	0.954627	0.967989	360	371
AQP10	0.102712	0.0480495	0.0847566	360	206
AQP11	-0.240232	2.86473e-06	1.41968e-05	360	371
AQP12A	0.000725003	0.988896	0.992333	360	3
AQP12B	0.202686	8.43422e-05	0.000308419	360	36
AQP1	0.190313	0.000226858	0.000750118	360	371
AQP2	0.0573404	0.270621	0.363909	360	40
AQP3	0.104207	0.0448714	0.0798436	360	371
AQP4	-0.0606085	0.244208	0.334716	360	313
AQP5	-0.079234	0.127659	0.195271	360	289
AQP6	-0.144481	0.00530111	0.012391	360	297
AQP7P1	-0.161604	0.00179166	0.00475658	360	369
AQP7P3	-0.073668	0.156751	0.231868	360	346
AQP7	-0.173198	0.000807742	0.0023533	360	369
AQP8	-0.103876	0.0455589	0.0809007	360	323
AQP9	-0.327759	9.71024e-11	9.96125e-10	360	371
AQPEP	0.128769	0.0130563	0.0273108	360	289
AQR	-0.067026	0.19771	0.280879	360	371
ARAF	0.0302842	0.560917	0.648479	360	371
ARAP1	0.255976	5.8133e-07	3.27432e-06	360	371
ARAP2	0.300919	3.33529e-09	2.76397e-08	360	371
ARAP3	0.265086	2.19891e-07	1.34377e-06	360	371
ARCN1	0.056399	0.278578	0.372873	360	371
ARC	0.105894	0.0414979	0.0747488	360	346
AREG	0.345812	7.34142e-12	8.8159e-11	360	341
ARF1	-0.0432566	0.40611	0.504491	360	371
ARF3	0.245331	1.72914e-06	8.89898e-06	360	371
ARF4	0.171128	0.000934722	0.00267705	360	371
ARF5	0.0886493	0.0881752	0.14285	360	371
ARF6	0.1506	0.00364244	0.00891677	360	371
ARFGAP1	0.215863	2.74886e-05	0.000112035	360	371
ARFGAP2	-0.172331	0.000858859	0.00248803	360	371
ARFGAP3	0.0918646	0.077194	0.127475	360	371
ARFGEF1	0.137552	0.00797507	0.0177222	360	371
ARFGEF2	-0.207383	5.70134e-05	0.000216347	360	371
ARFIP1	0.0998957	0.0545498	0.094548	360	371
ARFIP2	0.060738	0.2432	0.333634	360	371
ARFRP1	0.0569449	0.273945	0.367486	360	371
ARG1	-0.173766	0.000775843	0.00227032	360	371
ARG2	-0.0381411	0.463901	0.558994	360	371
ARGFXP2	-0.0430712	0.408127	0.506145	360	168
ARGFX	0.0607731	0.242927	0.333328	360	35
ARGLU1	0.17046	0.000979423	0.00279183	360	371
ARHGAP10	0.183917	0.000369492	0.00116749	360	371
ARHGAP11A	0.166092	0.00132412	0.00364474	360	371
ARHGAP11B	0.125724	0.0153904	0.0314705	360	338
ARHGAP12	-0.0374189	0.472413	0.567192	360	371
ARHGAP15	0.619301	1.15522e-40	1.34586e-38	360	371
ARHGAP17	0.286514	1.92904e-08	1.42651e-07	360	371
ARHGAP18	0.372594	1.15925e-13	1.72734e-12	360	371
ARHGAP19	0.165926	0.00133924	0.00367852	360	371
ARHGAP1	0.209069	4.94294e-05	0.00019003	360	371
ARHGAP20	0.0474817	0.361773	0.459148	360	366
ARHGAP21	-0.069579	0.18113	0.261294	360	371
ARHGAP22	0.573732	7.3672e-34	4.58654e-32	360	371
ARHGAP23	0.304319	2.17255e-09	1.84491e-08	360	371
ARHGAP24	0.0245934	0.636802	0.715854	360	371
ARHGAP25	0.613243	1.07539e-39	1.16434e-37	360	371
ARHGAP26	0.238937	3.25077e-06	1.59355e-05	360	371
ARHGAP27	0.339914	1.73873e-11	1.97599e-10	360	371
ARHGAP28	0.18694	0.000293997	0.000948197	360	363
ARHGAP29	0.033027	0.525969	0.617209	360	371
ARHGAP30	0.634554	3.36555e-43	5.15758e-41	360	371
ARHGAP31	0.303083	2.54056e-09	2.13737e-08	360	371
ARHGAP32	-0.181861	0.000430782	0.00134262	360	371
ARHGAP33	0.112959	0.029602	0.0557138	360	371
ARHGAP36	-0.0011064	0.983055	0.988663	360	58
ARHGAP39	0.23312	5.68645e-06	2.65741e-05	360	371
ARHGAP42	-0.116431	0.0249171	0.0480586	360	371
ARHGAP4	0.488712	1.14247e-23	3.95831e-22	360	371
ARHGAP5	-0.135515	0.00896318	0.0196246	360	371
ARHGAP6	0.195789	0.000147509	0.000510224	360	370
ARHGAP8	0.194696	0.000160897	0.000552024	360	354
ARHGAP9	0.713582	5.44018e-59	1.80632e-55	360	371
ARHGDIA	0.0929847	0.0736396	0.122285	360	371
ARHGDIB	0.652913	1.90442e-46	4.51665e-44	360	371
ARHGDIG	0.16812	0.00115219	0.00322387	360	127
ARHGEF10L	-0.150428	0.00368182	0.00899879	360	371
ARHGEF10	0.215167	2.92167e-05	0.00011828	360	371
ARHGEF11	-0.0857876	0.098973	0.157362	360	371
ARHGEF12	-0.129517	0.0125324	0.026306	360	371
ARHGEF15	0.114131	0.0279436	0.0529779	360	371
ARHGEF16	0.149043	0.00401262	0.00970021	360	369
ARHGEF17	0.281874	3.32584e-08	2.36718e-07	360	371
ARHGEF18	0.201542	9.26528e-05	0.000335483	360	371
ARHGEF19	0.16985	0.00102199	0.00289956	360	371
ARHGEF1	0.423218	1.48458e-17	3.29719e-16	360	371
ARHGEF2	0.415407	6.55125e-17	1.35669e-15	360	371
ARHGEF33	0.221519	1.66257e-05	7.0879e-05	360	345
ARHGEF35	-0.0173941	0.738434	0.800342	360	371
ARHGEF37	-0.104912	0.0434343	0.0776811	360	371
ARHGEF38	0.232957	5.77508e-06	2.69251e-05	360	145
ARHGEF3	0.406862	3.18123e-16	6.14708e-15	360	371
ARHGEF4	0.215387	2.86607e-05	0.000116336	360	324
ARHGEF5	0.0515586	0.32198	0.418673	360	370
ARHGEF6	0.372641	1.15043e-13	1.71548e-12	360	371
ARHGEF7	-0.00920315	0.859767	0.897473	360	371
ARHGEF9	-0.066883	0.19867	0.281982	360	371
ARID1A	-0.0274965	0.597546	0.681765	360	371
ARID1B	0.0872205	0.0934419	0.149953	360	371
ARID2	0.0532064	0.306737	0.402955	360	371
ARID3A	0.242974	2.18663e-06	1.10592e-05	360	371
ARID3B	0.146903	0.00457681	0.0109144	360	371
ARID3C	-0.264044	2.46229e-07	1.4919e-06	360	344
ARID4A	-0.0950075	0.0675594	0.113628	360	371
ARID4B	0.0197906	0.703986	0.771511	360	371
ARID5A	0.254133	7.04562e-07	3.90439e-06	360	371
ARID5B	0.365504	3.61121e-13	5.06995e-12	360	371
ARIH1	-0.0797914	0.124992	0.191635	360	371
ARIH2	-0.00699224	0.893223	0.923541	360	371
ARL10	0.119916	0.0208724	0.0410929	360	364
ARL11	0.570057	2.34693e-33	1.42983e-31	360	371
ARL13A	0.00187317	0.971316	0.98037	360	68
ARL13B	-0.0215036	0.679725	0.751302	360	371
ARL14	0.394461	2.91215e-15	5.18461e-14	360	316
ARL15	-0.0539441	0.300069	0.39584	360	371
ARL16	0.122602	0.0181558	0.0363993	360	371
ARL17A	0.0334618	0.520533	0.612453	360	371
ARL17B	-0.00189608	0.970965	0.980215	360	306
ARL1	0.0236062	0.650393	0.7265	360	371
ARL2BP	0.0448634	0.388881	0.487312	360	371
ARL2	0.318982	3.20937e-10	3.06066e-09	360	371
ARL3	0.110473	0.0334038	0.0619273	360	371
ARL4A	0.0789883	0.128848	0.196833	360	371
ARL4C	0.593144	1.26081e-36	1.04223e-34	360	371
ARL4D	-0.214581	3.07528e-05	0.000123945	360	371
ARL5A	0.0889474	0.0871071	0.141373	360	371
ARL5B	-0.0377049	0.469032	0.56371	360	371
ARL5C	0.0939817	0.0705892	0.117947	360	66
ARL6IP1	-0.177953	0.000574064	0.00173754	360	371
ARL6IP4	0.00851075	0.870221	0.905491	360	371
ARL6IP5	0.213263	3.44877e-05	0.00013744	360	371
ARL6IP6	0.204218	7.42986e-05	0.000275177	360	371
ARL6	0.0250374	0.630729	0.710671	360	370
ARL8A	0.0226597	0.663533	0.73758	360	371
ARL8B	0.0495707	0.341015	0.438501	360	371
ARL9	0.226126	1.09312e-05	4.8201e-05	360	215
ARMC10	-0.00118562	0.981842	0.987792	360	371
ARMC1	-0.0643396	0.216322	0.302659	360	371
ARMC2	0.226177	1.08798e-05	4.79954e-05	360	371
ARMC3	0.22809	9.1167e-06	4.0805e-05	360	117
ARMC4	0.1059	0.0414864	0.0747348	360	199
ARMC5	-0.134715	0.00937978	0.0204111	360	371
ARMC6	-0.115953	0.0255215	0.0490063	360	371
ARMC7	0.221268	1.70056e-05	7.23283e-05	360	371
ARMC8	0.0551188	0.289652	0.384876	360	371
ARMC9	0.413939	8.62151e-17	1.75801e-15	360	371
ARMCX1	0.346185	6.94852e-12	8.40488e-11	360	371
ARMCX2	0.344281	9.1988e-12	1.08823e-10	360	371
ARMCX3	0.203782	7.70349e-05	0.00028436	360	371
ARMCX5	0.0305223	0.55784	0.645681	360	371
ARMCX6	0.276202	6.38685e-08	4.31464e-07	360	371
ARMS2	0.0572849	0.271086	0.364411	360	199
ARNT2	0.39672	1.95899e-15	3.55761e-14	360	363
ARNTL2	0.285141	2.26885e-08	1.65933e-07	360	366
ARNTL	-0.136854	0.00830227	0.0183551	360	371
ARNT	-0.283634	2.70834e-08	1.95208e-07	360	371
ARPC1A	0.097196	0.0614505	0.104661	360	371
ARPC1B	0.494719	2.68082e-24	9.58838e-23	360	371
ARPC2	0.581215	6.6477e-35	4.58254e-33	360	371
ARPC3	0.359546	9.18393e-13	1.22793e-11	360	371
ARPC4	0.382088	2.42197e-14	3.91325e-13	360	371
ARPC5L	0.313831	6.35887e-10	5.83785e-09	360	371
ARPC5	0.168909	0.00109105	0.00307568	360	371
ARPM1	-0.0214328	0.680722	0.752174	360	371
ARPP19	-0.0647816	0.213176	0.298866	360	371
ARPP21	-0.135981	0.00872799	0.0191877	360	287
ARR3	0.0597645	0.25085	0.34222	360	61
ARRB1	0.220272	1.85955e-05	7.84371e-05	360	371
ARRB2	0.319385	3.04053e-10	2.91358e-09	360	371
ARRDC1	0.16234	0.00170585	0.00455976	360	371
ARRDC2	0.160647	0.00190905	0.00502805	360	371
ARRDC3	-0.0693065	0.182849	0.263259	360	371
ARRDC4	-0.121145	0.0195883	0.03888	360	371
ARRDC5	0.515005	1.61444e-26	6.62208e-25	360	302
ARSA	-0.139695	0.0070418	0.0158839	360	371
ARSB	0.0506617	0.330481	0.427367	360	371
ARSD	-0.321179	2.38786e-10	2.32053e-09	360	371
ARSE	-0.0751024	0.148814	0.222196	360	364
ARSF	0.0191623	0.712962	0.779135	360	268
ARSG	0.0315374	0.54481	0.634127	360	371
ARSH	0.0200309	0.700564	0.768732	360	19
ARSI	0.224091	1.31697e-05	5.71105e-05	360	356
ARSJ	0.201007	9.68035e-05	0.00034899	360	369
ARSK	-0.232756	5.88619e-06	2.73924e-05	360	371
ART1	0.0679589	0.191528	0.27356	360	50
ART3	0.213607	3.34714e-05	0.000133604	360	199
ART4	0.0628821	0.22693	0.314958	360	369
ART5	0.176208	0.000651392	0.00194354	360	254
ARTN	0.23099	6.95334e-06	3.17863e-05	360	360
ARV1	-0.230587	7.22218e-06	3.28944e-05	360	371
ARVCF	0.040992	0.431148	0.527698	360	371
ARX	0.137544	0.00797876	0.0177284	360	117
AR	-0.320411	2.64876e-10	2.5591e-09	360	361
AS3MT	-0.205548	6.6511e-05	0.000249066	360	371
ASAH1	0.253828	7.27278e-07	4.01821e-06	360	371
ASAH2B	-0.170211	0.000996629	0.00283357	360	318
ASAH2	-0.22395	1.33393e-05	5.77961e-05	360	355
ASAM	0.410142	1.74395e-16	3.45357e-15	360	285
ASAP1IT1	0.0181776	0.72711	0.790908	360	13
ASAP1	0.368288	2.3189e-13	3.31638e-12	360	371
ASAP2	0.0207586	0.690238	0.760246	360	371
ASAP3	-0.127418	0.0140501	0.0291115	360	371
ASB10	0.0784899	0.131286	0.199823	360	22
ASB11	0.033015	0.526119	0.617349	360	53
ASB12	0.129388	0.0126217	0.0264796	360	229
ASB13	-0.157481	0.00234957	0.00604521	360	371
ASB14	0.0998958	0.0545494	0.094548	360	359
ASB15	-0.118624	0.0222996	0.0435541	360	136
ASB16	-0.0837631	0.107228	0.168458	360	365
ASB17	0.027313	0.599995	0.683777	360	29
ASB18	0.0955154	0.0660989	0.111501	360	6
ASB1	0.286961	1.82944e-08	1.35739e-07	360	371
ASB2	0.627867	4.52896e-42	6.09635e-40	360	369
ASB3	0.109114	0.0356519	0.0654554	360	371
ASB4	-0.148604	0.00412298	0.00994046	360	320
ASB5	-0.0250512	0.63054	0.710539	360	99
ASB6	0.229581	7.93538e-06	3.58234e-05	360	371
ASB7	-0.152152	0.00330453	0.00817495	360	371
ASB8	-0.179463	0.000514155	0.00157391	360	371
ASB9	-0.0241187	0.643322	0.721127	360	371
ASCC1	0.0822072	0.113934	0.176983	360	371
ASCC2	-0.119503	0.0213197	0.0418701	360	371
ASCC3	0.10525	0.0427594	0.0766399	360	371
ASCL1	-0.214033	3.22556e-05	0.000129165	360	281
ASCL2	0.469631	9.48233e-22	2.8753e-20	360	364
ASCL3	0.011669	0.82275	0.868066	360	39
ASCL4	0.146695	0.00463542	0.0110322	360	125
ASF1A	0.0507029	0.330088	0.42696	360	371
ASF1B	0.177144	0.000608789	0.00183179	360	371
ASFMR1	-0.202102	8.84968e-05	0.000322124	360	252
ASGR1	-0.174079	0.000758731	0.00222744	360	371
ASGR2	-0.114862	0.0269484	0.0513355	360	371
ASH1L	-0.116137	0.0252875	0.0486225	360	371
ASH2L	-0.0298155	0.566999	0.654031	360	371
ASIP	-0.0299874	0.564765	0.652019	360	308
ASL	-0.209089	4.93472e-05	0.00018975	360	371
ASMTL	-0.25847	4.47145e-07	2.58279e-06	360	371
ASMT	0.220025	1.9012e-05	8.00587e-05	360	158
ASNA1	0.0216684	0.677408	0.749282	360	371
ASNSD1	-0.151889	0.00335965	0.00829072	360	371
ASNS	0.312731	7.34677e-10	6.68016e-09	360	371
ASPA	-0.0833798	0.108851	0.170629	360	365
ASPDH	-0.300996	3.30317e-09	2.74077e-08	360	364
ASPG	0.0275899	0.596301	0.680735	360	340
ASPHD1	0.166417	0.00129511	0.00357456	360	362
ASPHD2	0.477326	1.64958e-22	5.26651e-21	360	370
ASPH	0.0916996	0.0777292	0.128157	360	371
ASPM	0.090233	0.0826189	0.135156	360	371
ASPN	0.24772	1.3597e-06	7.14912e-06	360	371
ASPRV1	0.00688507	0.89485	0.924932	360	371
ASPSCR1	-0.181607	0.00043897	0.00136472	360	371
ASRGL1	0.227189	9.91007e-06	4.40885e-05	360	371
ASS1	-0.197132	0.000132493	0.00046332	360	371
ASTE1	0.00921413	0.859601	0.897442	360	371
ASTL	0.264452	2.35573e-07	1.42951e-06	360	105
ASTN1	-0.0258487	0.619694	0.700933	360	339
ASTN2	-0.115398	0.0262395	0.0501866	360	371
ASXL1	0.197509	0.000128537	0.000451147	360	371
ASXL2	-0.0596303	0.251918	0.343371	360	371
ASXL3	-0.111224	0.0322139	0.0599949	360	270
ASZ1	0.0566914	0.27609	0.36994	360	40
ATAD1	-0.128359	0.0133508	0.0278392	360	371
ATAD2B	-0.0325347	0.532159	0.622895	360	371
ATAD2	0.141511	0.00632847	0.0144881	360	371
ATAD3A	0.0190895	0.714005	0.779847	360	371
ATAD3B	0.195637	0.000149299	0.00051584	360	371
ATAD3C	0.0420691	0.41913	0.516606	360	370
ATAD5	0.0793959	0.12688	0.194259	360	371
ATCAY	0.079554	0.126122	0.193188	360	88
ATE1	-0.152556	0.00322132	0.00799492	360	371
ATF1	0.0271306	0.602433	0.685776	360	371
ATF2	-0.109538	0.0349368	0.0642907	360	371
ATF3	0.00515413	0.921185	0.943817	360	371
ATF4	0.210534	4.3624e-05	0.000169689	360	371
ATF5	-0.0464554	0.372256	0.469818	360	371
ATF6B	-0.0522667	0.315371	0.412042	360	371
ATF6	-0.207907	5.45487e-05	0.000207746	360	371
ATF7IP2	-0.199578	0.000108758	0.000388572	360	371
ATF7IP	-0.0061535	0.905968	0.932171	360	371
ATF7	0.0134528	0.796209	0.846519	360	371
ATG10	-0.152156	0.00330376	0.00817405	360	371
ATG12	-0.0560217	0.281812	0.376518	360	371
ATG16L1	0.0507691	0.329456	0.42633	360	371
ATG16L2	0.100127	0.0539892	0.0937073	360	371
ATG2A	-0.129254	0.0127147	0.0266577	360	371
ATG2B	0.00646385	0.901249	0.929175	360	371
ATG3	0.12246	0.0182908	0.036633	360	371
ATG4A	-0.0965152	0.0632999	0.107306	360	371
ATG4B	0.175313	0.000694677	0.00205973	360	371
ATG4C	-0.0694479	0.181955	0.262257	360	371
ATG4D	0.0886705	0.0880992	0.142762	360	371
ATG5	0.134131	0.00969487	0.020989	360	371
ATG7	0.365048	3.88103e-13	5.42201e-12	360	371
ATG9A	-0.00928722	0.858499	0.896541	360	371
ATG9B	0.380768	3.02038e-14	4.84087e-13	360	365
ATHL1	0.120232	0.0205348	0.0404884	360	371
ATIC	0.229743	7.8158e-06	3.53396e-05	360	371
ATL1	0.16381	0.00154565	0.00417808	360	371
ATL2	-0.317879	3.71954e-10	3.51354e-09	360	371
ATL3	-0.0309774	0.551979	0.640544	360	371
ATMIN	0.0104029	0.841713	0.88279	360	371
ATM	0.159363	0.00207774	0.00541719	360	371
ATN1	0.222501	1.52147e-05	6.52125e-05	360	371
ATOH1	0.0727887	0.161773	0.237992	360	17
ATOH7	0.0129286	0.803985	0.852784	360	353
ATOH8	-0.0989275	0.0569467	0.0980801	360	371
ATOX1	-0.12376	0.0170832	0.0345268	360	371
ATP10A	0.368482	2.24815e-13	3.22678e-12	360	369
ATP10B	0.16598	0.00133435	0.0036666	360	246
ATP10D	0.17682	0.000623219	0.00186921	360	371
ATP11A	0.031164	0.549586	0.638492	360	371
ATP11B	0.0304908	0.558246	0.646066	360	371
ATP11C	-0.0755066	0.146634	0.21946	360	371
ATP12A	0.10373	0.0458646	0.0814	360	69
ATP13A1	0.159391	0.00207389	0.00540786	360	371
ATP13A2	0.385941	1.26418e-14	2.11995e-13	360	371
ATP13A3	-0.201273	9.47169e-05	0.000342149	360	371
ATP13A4	0.221787	1.62291e-05	6.92772e-05	360	210
ATP13A5	0.120506	0.0202463	0.0399828	360	20
ATP1A1	0.243186	2.14114e-06	1.08511e-05	360	371
ATP1A2	0.103223	0.0469431	0.0830919	360	364
ATP1A3	0.470669	7.50956e-22	2.28755e-20	360	331
ATP1A4	0.303597	2.38074e-09	2.01227e-08	360	147
ATP1B1	-0.0717748	0.167711	0.24542	360	371
ATP1B2	0.0924377	0.0753586	0.124734	360	369
ATP1B3	0.404709	4.70413e-16	8.9766e-15	360	371
ATP1B4	0.0716066	0.168712	0.246685	360	18
ATP2A1	0.0301405	0.562778	0.650178	360	364
ATP2A2	-0.0474112	0.362488	0.459762	360	371
ATP2A3	0.58052	8.33391e-35	5.6859e-33	360	371
ATP2B1	0.163286	0.00160107	0.00431268	360	371
ATP2B2	-0.15275	0.00318213	0.00791143	360	371
ATP2B3	-0.0268021	0.606836	0.690072	360	139
ATP2B4	0.0694423	0.18199	0.262288	360	371
ATP2C1	0.0311558	0.549691	0.638512	360	371
ATP2C2	0.227163	9.93397e-06	4.41751e-05	360	277
ATP4A	-0.00125065	0.980846	0.987089	360	116
ATP4B	0.0454718	0.382475	0.480524	360	68
ATP5A1	-0.0476806	0.359764	0.457297	360	371
ATP5B	-0.111433	0.0318893	0.0594794	360	371
ATP5C1	-0.0484994	0.351564	0.448994	360	371
ATP5D	-0.0435039	0.40343	0.501944	360	371
ATP5EP2	0.142194	0.00607779	0.0139882	360	371
ATP5E	0.131536	0.0112113	0.0238342	360	371
ATP5F1	-0.0367514	0.480355	0.574935	360	371
ATP5G1	-0.0864492	0.0963877	0.153779	360	371
ATP5G2	0.151578	0.00342611	0.00844008	360	371
ATP5G3	-0.0580517	0.264712	0.357183	360	371
ATP5H	-0.115735	0.0258016	0.049482	360	371
ATP5I	-0.0128485	0.805175	0.853773	360	371
ATP5J2	-0.0420231	0.419639	0.516977	360	371
ATP5J	-0.142121	0.00610403	0.0140387	360	371
ATP5L2	0.0418127	0.421973	0.519243	360	224
ATP5L	0.0663309	0.20241	0.286413	360	371
ATP5O	-0.0595569	0.252503	0.34405	360	371
ATP5SL	0.0571911	0.271872	0.365271	360	371
ATP5S	-0.162099	0.00173354	0.00462323	360	371
ATP6AP1L	-0.205186	6.85506e-05	0.000255839	360	371
ATP6AP1	0.152306	0.00327267	0.00810596	360	371
ATP6AP2	0.18786	0.000274041	0.000889307	360	371
ATP6V0A1	-0.0637773	0.220372	0.307375	360	371
ATP6V0A2	0.141382	0.00637705	0.0145792	360	371
ATP6V0A4	0.170958	0.000945899	0.00270672	360	117
ATP6V0B	0.122441	0.0183092	0.0366576	360	371
ATP6V0C	0.0715	0.169349	0.247435	360	371
ATP6V0D1	0.0989674	0.0568463	0.0979658	360	371
ATP6V0D2	0.250317	1.04412e-06	5.60368e-06	360	340
ATP6V0E1	0.0811745	0.118563	0.183258	360	371
ATP6V0E2	-0.24571	1.66467e-06	8.60719e-06	360	371
ATP6V1A	-0.131259	0.0113848	0.0241645	360	371
ATP6V1B1	0.18753	0.000281059	0.0009103	360	348
ATP6V1B2	0.19821	0.000121488	0.000428292	360	371
ATP6V1C1	0.153776	0.00298159	0.00746785	360	371
ATP6V1C2	0.156908	0.00243854	0.00624389	360	371
ATP6V1D	0.0971348	0.0616148	0.104869	360	371
ATP6V1E1	0.1379	0.00781637	0.0174181	360	371
ATP6V1E2	0.0994277	0.0556976	0.0962365	360	370
ATP6V1F	0.274534	7.71594e-08	5.14275e-07	360	371
ATP6V1G1	0.0293106	0.573586	0.660214	360	371
ATP6V1G2	-0.0596494	0.251765	0.343256	360	364
ATP6V1G3	0.0754022	0.147195	0.22025	360	28
ATP6V1H	0.184042	0.000366051	0.00115753	360	371
ATP7A	0.168325	0.00113603	0.0031867	360	371
ATP7B	-0.197299	0.000130728	0.00045763	360	371
ATP8A1	0.28087	3.73708e-08	2.63722e-07	360	371
ATP8A2	0.2147	3.04352e-05	0.000122764	360	249
ATP8B1	-0.100302	0.0535697	0.0930523	360	371
ATP8B2	0.275138	7.20651e-08	4.82096e-07	360	371
ATP8B3	0.18531	0.000332715	0.00106138	360	371
ATP8B4	0.195704	0.000148504	0.000513359	360	371
ATP8B5P	0.18289	0.000399033	0.00125189	360	371
ATP9A	0.112472	0.0303167	0.0569139	360	371
ATP9B	-0.0198128	0.70367	0.771265	360	371
ATPAF1	-0.18971	0.000237698	0.000782713	360	371
ATPAF2	-0.10194	0.0497627	0.0873071	360	371
ATPBD4	-0.0801134	0.123472	0.189595	360	371
ATPIF1	-0.122627	0.0181321	0.0363555	360	371
ATRIP	0.0366215	0.481909	0.576301	360	371
ATRNL1	-0.00786172	0.88004	0.913371	360	333
ATRN	-0.191593	0.000205347	0.000687665	360	371
ATRX	0.0571917	0.271868	0.365271	360	371
ATR	0.134126	0.00969756	0.0209903	360	371
ATXN10	0.00295207	0.954809	0.968075	360	371
ATXN1L	-0.0759422	0.144311	0.216505	360	371
ATXN1	-0.0611899	0.239704	0.329769	360	371
ATXN2L	0.0665823	0.2007	0.284459	360	371
ATXN2	-0.0312359	0.548665	0.637645	360	371
ATXN3L	0.192764	0.000187372	0.000632254	360	11
ATXN3	-0.0149019	0.774819	0.829934	360	371
ATXN7L1	-0.199027	0.000113729	0.00040452	360	371
ATXN7L2	0.130659	0.0117692	0.0248797	360	371
ATXN7L3B	-0.080325	0.122481	0.188334	360	371
ATXN7L3	0.120121	0.0206526	0.0407045	360	371
ATXN7	-0.0579171	0.265823	0.358401	360	371
AUH	-0.231169	6.83765e-06	3.13149e-05	360	371
AUP1	-0.0485135	0.351423	0.448872	360	371
AURKAIP1	-0.0827993	0.111344	0.173799	360	371
AURKAPS1	0.176396	0.000642605	0.00191991	360	367
AURKA	0.0522014	0.315976	0.41259	360	371
AURKB	0.273974	8.2196e-08	5.44565e-07	360	371
AURKC	0.262136	3.02485e-07	1.80476e-06	360	370
AUTS2	-0.213656	3.33296e-05	0.000133064	360	371
AVEN	-0.069861	0.179364	0.259084	360	371
AVIL	-0.0569831	0.273623	0.367128	360	369
AVL9	-0.105484	0.0422971	0.0759479	360	371
AVPI1	-0.101458	0.0508583	0.0889786	360	371
AVPR1A	-0.160854	0.00188312	0.00497093	360	333
AVPR1B	0.168338	0.001135	0.00318472	360	58
AVPR2	0.0438353	0.399854	0.49846	360	345
AVP	-0.044501	0.392728	0.491206	360	99
AWAT1	0.0956117	0.0658252	0.111095	360	75
AWAT2	0.111249	0.0321751	0.0599338	360	82
AXIN1	0.14464	0.00525034	0.0122882	360	371
AXIN2	-0.0363328	0.485373	0.579608	360	371
AXL	0.536805	4.46705e-29	2.07927e-27	360	371
AZGP1	-0.275148	7.19807e-08	4.81693e-07	360	371
AZI1	0.144945	0.00515465	0.0120927	360	371
AZI2	-0.0398268	0.444371	0.540593	360	371
AZIN1	0.0465801	0.370972	0.468492	360	371
AZU1	0.205416	6.72448e-05	0.000251626	360	200
B2M	0.26676	1.83196e-07	1.13519e-06	360	371
B3GALNT1	0.309148	1.17075e-09	1.03385e-08	360	370
B3GALNT2	0.089692	0.0844843	0.137699	360	371
B3GALT1	-0.0845796	0.103836	0.163916	360	142
B3GALT2	0.49718	1.46807e-24	5.33701e-23	360	358
B3GALT4	0.36877	2.14691e-13	3.08815e-12	360	371
B3GALT5	0.229756	7.80666e-06	3.53143e-05	360	146
B3GALT6	0.0767219	0.140224	0.211532	360	371
B3GALTL	-0.0285167	0.584016	0.669704	360	371
B3GAT1	0.14179	0.00622486	0.0142854	360	360
B3GAT2	0.00464468	0.928954	0.949544	360	338
B3GAT3	0.0805747	0.121319	0.186808	360	371
B3GNT1	-0.234608	4.93535e-06	2.33671e-05	360	371
B3GNT2	0.0755874	0.146201	0.218927	360	371
B3GNT3	0.211182	4.12688e-05	0.000161334	360	359
B3GNT4	0.198285	0.000120752	0.000426151	360	302
B3GNT5	0.0464468	0.372344	0.469899	360	371
B3GNT6	0.015375	0.76787	0.824175	360	35
B3GNT7	0.448365	9.52219e-20	2.48625e-18	360	371
B3GNT8	0.437916	8.16768e-19	1.99407e-17	360	369
B3GNT9	0.357081	1.34358e-12	1.75866e-11	360	371
B3GNTL1	0.124038	0.0168335	0.0340891	360	371
B4GALNT1	0.156908	0.00243865	0.00624389	360	371
B4GALNT2	0.0158832	0.760429	0.818127	360	185
B4GALNT3	0.223556	1.38264e-05	5.97506e-05	360	334
B4GALNT4	0.290672	1.17397e-08	9.00573e-08	360	286
B4GALT1	0.0590195	0.256816	0.348977	360	371
B4GALT2	0.197362	0.000130067	0.000455634	360	371
B4GALT3	0.142461	0.00598207	0.0137902	360	371
B4GALT4	0.183968	0.000368085	0.00116341	360	371
B4GALT5	0.275569	6.86241e-08	4.61245e-07	360	371
B4GALT6	0.0519422	0.318389	0.414924	360	371
B4GALT7	0.0459588	0.377394	0.475099	360	371
B9D1	0.079432	0.126706	0.194009	360	371
B9D2	0.319313	3.07002e-10	2.93761e-09	360	371
BAALC	0.0872194	0.0934461	0.149953	360	371
BAAT	-0.29595	6.17819e-09	4.9371e-08	360	371
BACE1	-0.147697	0.00435974	0.0104481	360	371
BACE2	0.279681	4.28767e-08	2.98668e-07	360	371
BACH1	0.00807628	0.876792	0.910759	360	371
BACH2	0.148509	0.00414724	0.00999047	360	370
BAD	-0.0516125	0.321474	0.418261	360	371
BAG1	-0.0234626	0.65238	0.728107	360	371
BAG2	-0.00818661	0.875122	0.909404	360	371
BAG3	0.166041	0.00132877	0.00365431	360	371
BAG4	-0.134443	0.00952567	0.0206879	360	371
BAG5	0.114099	0.0279876	0.0530513	360	371
BAGE2	0.00432808	0.933785	0.953162	360	262
BAGE	0.0638882	0.219569	0.306449	360	140
BAHCC1	0.0981979	0.05881	0.100853	360	371
BAHD1	0.0560341	0.281705	0.37645	360	371
BAI1	0.276722	6.01914e-08	4.08285e-07	360	338
BAI2	0.287767	1.66246e-08	1.24463e-07	360	346
BAI3	0.271082	1.13652e-07	7.31796e-07	360	260
BAIAP2L1	0.0957512	0.0654298	0.11054	360	371
BAIAP2L2	0.185427	0.000329788	0.0010534	360	371
BAIAP2	-0.160874	0.00188061	0.00496693	360	371
BAIAP3	-0.198987	0.000114097	0.00040561	360	371
BAK1	0.276388	6.25294e-08	4.23376e-07	360	371
BAMBI	0.193329	0.000179232	0.00060912	360	371
BANF1	0.195279	0.000153615	0.000529285	360	371
BANF2	0.00370196	0.943346	0.960314	360	207
BANK1	0.468347	1.2641e-21	3.79268e-20	360	320
BANP	-0.0984774	0.0580903	0.0997908	360	371
BAP1	-0.11607	0.0253729	0.0487725	360	371
BARD1	0.0136362	0.793493	0.84427	360	347
BARHL1	-0.00122125	0.981296	0.987393	360	24
BARHL2	0.0929813	0.0736503	0.122292	360	16
BARX1	0.0222885	0.668715	0.742305	360	254
BARX2	0.34568	7.48679e-12	8.97424e-11	360	213
BASE	0.0924529	0.0753101	0.124664	360	50
BASP1	0.504885	2.15884e-25	8.2234e-24	360	371
BAT1	0.107822	0.0379082	0.0690695	360	371
BAT2L1	0.0259595	0.618194	0.699714	360	371
BAT2L2	0.0545972	0.294247	0.389934	360	371
BAT2	-0.0229479	0.659522	0.734268	360	371
BAT3	-0.13287	0.0104072	0.0223376	360	371
BAT4	-0.117702	0.0233698	0.0454128	360	371
BAT5	-0.126917	0.0144356	0.0298109	360	371
BATF2	0.356435	1.48385e-12	1.93211e-11	360	371
BATF3	0.58951	4.29423e-36	3.39483e-34	360	369
BATF	0.523998	1.49685e-27	6.58282e-26	360	371
BAX	0.420127	2.68347e-17	5.77947e-16	360	371
BAZ1A	0.128623	0.0131602	0.0275021	360	371
BAZ1B	0.00363479	0.944373	0.961064	360	371
BAZ2A	0.149958	0.00379111	0.00922631	360	371
BAZ2B	0.0553636	0.287512	0.382742	360	371
BBC3	0.283934	2.6147e-08	1.89074e-07	360	371
BBOX1	-0.125044	0.0159591	0.0325255	360	362
BBS10	-0.185473	0.00032862	0.00105017	360	371
BBS12	0.316039	4.75107e-10	4.43121e-09	360	371
BBS1	-0.0991832	0.0563052	0.0971882	360	371
BBS2	-0.0811273	0.118779	0.183549	360	371
BBS4	-0.146664	0.00464407	0.011051	360	371
BBS5	0.120004	0.0207778	0.040927	360	371
BBS7	0.124656	0.0162912	0.0331278	360	371
BBS9	-0.0658426	0.20576	0.290102	360	371
BBX	0.139342	0.00718865	0.0161749	360	371
BCAM	0.121775	0.0189571	0.0377853	360	371
BCAN	0.147586	0.0043894	0.0105122	360	355
BCAP29	-0.0444206	0.393585	0.491999	360	371
BCAP31	0.0878909	0.0909404	0.146567	360	371
BCAR1	0.0993135	0.0559808	0.0966756	360	371
BCAR3	0.0607008	0.243489	0.334008	360	371
BCAR4	0.11076	0.0329443	0.0612179	360	85
BCAS1	0.211578	3.98892e-05	0.000156616	360	344
BCAS2	-0.0243152	0.64062	0.718969	360	371
BCAS3	-0.232499	6.03134e-06	2.79954e-05	360	371
BCAS4	0.541009	1.36484e-29	6.47391e-28	360	371
BCAT1	0.46953	9.69912e-22	2.93656e-20	360	371
BCAT2	-0.0528204	0.310264	0.40681	360	371
BCCIP	0.025256	0.627747	0.707992	360	371
BCDIN3D	-0.0107252	0.836877	0.879339	360	371
BCHE	-0.0109482	0.833533	0.876612	360	370
BCKDHA	-0.178079	0.000568859	0.0017231	360	371
BCKDHB	-0.298862	4.31075e-09	3.51818e-08	360	371
BCKDK	-0.138012	0.00776605	0.0173234	360	371
BCL10	0.270839	1.16769e-07	7.49683e-07	360	371
BCL11A	0.402842	6.58814e-16	1.24525e-14	360	351
BCL11B	0.63744	1.07403e-43	1.79806e-41	360	369
BCL2A1	0.55424	2.92505e-31	1.52947e-29	360	371
BCL2L10	-0.0869834	0.0943397	0.151042	360	319
BCL2L11	0.1061	0.0411016	0.0741153	360	371
BCL2L12	0.233606	5.42971e-06	2.54459e-05	360	371
BCL2L13	-0.211204	4.11911e-05	0.000161093	360	371
BCL2L14	0.307297	1.48588e-09	1.29321e-08	360	355
BCL2L15	0.244985	1.79003e-06	9.17443e-06	360	359
BCL2L1	0.0795691	0.126051	0.193108	360	371
BCL2L2	0.0148475	0.775618	0.830322	360	371
BCL2	0.394673	2.80584e-15	4.99982e-14	360	371
BCL3	0.231332	6.73377e-06	3.09104e-05	360	371
BCL6B	0.158086	0.0022589	0.00583077	360	371
BCL6	-0.0152014	0.770417	0.826285	360	371
BCL7A	0.0282622	0.587378	0.672514	360	371
BCL7B	0.0435392	0.403047	0.501594	360	371
BCL7C	0.178133	0.000566606	0.00171758	360	371
BCL8	0.0275396	0.596972	0.681267	360	219
BCL9L	0.151099	0.0035306	0.00867068	360	371
BCL9	0.0767661	0.139995	0.211254	360	371
BCLAF1	0.121728	0.0190032	0.0378657	360	371
BCMO1	0.0539519	0.299999	0.395833	360	316
BCO2	-0.0148667	0.775336	0.830204	360	370
BCORL1	0.0836889	0.107541	0.168868	360	371
BCORL2	0.310197	1.02209e-09	9.10236e-09	360	202
BCOR	-0.0114373	0.826213	0.870521	360	371
BCR	0.150181	0.00373883	0.00911963	360	371
BCS1L	-0.0625115	0.229686	0.31825	360	371
BCYRN1	-0.0126555	0.808044	0.85636	360	3
BDH1	-0.283958	2.60722e-08	1.88602e-07	360	371
BDH2	-0.0905829	0.0814305	0.133475	360	371
BDKRB1	0.25333	7.65817e-07	4.21453e-06	360	361
BDKRB2	0.186515	0.000303661	0.000976836	360	371
BDNFOS	-0.273026	9.14474e-08	6.00268e-07	360	371
BDNF	0.193174	0.000181439	0.000615426	360	344
BDP1	-0.0664719	0.20145	0.285379	360	371
BEAN	0.254108	7.06409e-07	3.91354e-06	360	351
BECN1	0.117619	0.0234676	0.0455941	360	371
BEGAIN	0.206751	6.01288e-05	0.000227389	360	345
BEND2	0.0106629	0.837811	0.879929	360	33
BEND3	0.2585	4.45717e-07	2.57528e-06	360	371
BEND4	0.404126	5.22665e-16	9.92614e-15	360	228
BEND5	0.259005	4.22476e-07	2.45309e-06	360	355
BEND6	0.324472	1.52625e-10	1.53102e-09	360	279
BEND7	-0.0585775	0.260402	0.352739	360	371
BEST1	0.275301	7.07449e-08	4.7406e-07	360	370
BEST2	0.00392459	0.939946	0.957684	360	57
BEST3	0.115768	0.0257591	0.0494196	360	120
BEST4	0.0590769	0.256353	0.348486	360	352
BET1L	0.0264599	0.611438	0.694276	360	371
BET1	0.00764216	0.883366	0.915856	360	371
BET3L	0.214525	3.0904e-05	0.000124478	360	209
BEX1	0.0792905	0.127386	0.19496	360	299
BEX2	0.132345	0.0107172	0.0228929	360	353
BEX4	0.253081	7.85766e-07	4.31478e-06	360	371
BEX5	0.0639704	0.218975	0.305855	360	364
BEYLA	-0.0223841	0.66738	0.74107	360	17
BFAR	0.00608251	0.907048	0.9328	360	371
BFSP1	0.102841	0.047768	0.0843573	360	371
BFSP2	0.335507	3.27225e-11	3.59965e-10	360	274
BGLAP	0.0423892	0.415597	0.513491	360	371
BGN	0.362975	5.37968e-13	7.36085e-12	360	371
BHLHA15	0.0568555	0.2747	0.36835	360	344
BHLHB9	-0.0945298	0.0689569	0.115617	360	371
BHLHE22	0.344056	9.50878e-12	1.12224e-10	360	329
BHLHE40	-0.0670035	0.197861	0.281034	360	371
BHLHE41	0.438644	7.04829e-19	1.72926e-17	360	369
BHMT2	-0.315503	5.10069e-10	4.73955e-09	360	371
BHMT	-0.304263	2.18824e-09	1.85744e-08	360	371
BICC1	0.291081	1.11757e-08	8.60618e-08	360	343
BICD1	0.290464	1.20372e-08	9.21622e-08	360	367
BICD2	0.195888	0.000146348	0.000506874	360	371
BID	0.173955	0.000765453	0.00224328	360	371
BIK	0.0802854	0.122666	0.188575	360	359
BIN1	0.142125	0.0061027	0.0140387	360	371
BIN2	0.674273	1.60441e-50	7.10291e-48	360	371
BIN3	0.182885	0.000399176	0.00125215	360	371
BIRC2	0.0336385	0.518331	0.610223	360	371
BIRC3	0.37456	8.4168e-14	1.27319e-12	360	371
BIRC5	0.233969	5.24548e-06	2.46871e-05	360	371
BIRC6	-0.0821648	0.114121	0.177231	360	371
BIRC7	0.386171	1.21581e-14	2.04228e-13	360	278
BIRC8	0.068956	0.185078	0.265949	360	6
BIVM	-0.114658	0.0272234	0.0518098	360	371
BLCAP	-0.199087	0.000113172	0.000402897	360	371
BLID	-0.0673035	0.195856	0.278643	360	44
BLK	0.339267	1.90908e-11	2.15727e-10	360	321
BLMH	0.293525	8.31112e-09	6.50586e-08	360	371
BLM	0.25999	3.80523e-07	2.22964e-06	360	371
BLNK	0.0397372	0.445397	0.541577	360	371
BLOC1S1	-0.0571615	0.272121	0.365532	360	371
BLOC1S2	0.178248	0.000561885	0.00170534	360	371
BLOC1S3	0.193322	0.000179327	0.000609339	360	371
BLVRA	0.358764	1.03665e-12	1.37498e-11	360	371
BLVRB	-0.190984	0.000215337	0.000716903	360	371
BLZF1	-0.0801806	0.123157	0.189213	360	371
BMF	0.302753	2.64852e-09	2.22444e-08	360	371
BMI1	-0.0935598	0.0718672	0.119771	360	371
BMP10	0.0788763	0.129393	0.197519	360	71
BMP15	0.00767493	0.882869	0.91559	360	13
BMP1	-0.002655	0.959352	0.971445	360	371
BMP2K	0.287182	1.78208e-08	1.3267e-07	360	371
BMP2	0.0790027	0.128778	0.196747	360	371
BMP3	0.27517	7.18012e-08	4.80815e-07	360	106
BMP4	-0.0229607	0.659343	0.734151	360	371
BMP5	0.316846	4.26841e-10	4.00166e-09	360	230
BMP6	0.187609	0.000279366	0.000905407	360	371
BMP7	0.181005	0.00045898	0.00142139	360	207
BMP8A	0.204006	7.56216e-05	0.000279661	360	371
BMP8B	0.0200044	0.700941	0.769036	360	359
BMPER	0.149355	0.00393578	0.00953645	360	333
BMPR1A	0.0378879	0.466876	0.561899	360	371
BMPR1B	0.364668	4.12155e-13	5.74192e-12	360	282
BMPR2	0.0878346	0.0911483	0.146843	360	371
BMS1P4	-0.0659122	0.20528	0.289672	360	368
BMS1P5	-0.0604436	0.245495	0.336171	360	371
BMS1	0.255438	6.1502e-07	3.44945e-06	360	371
BMX	0.202723	8.40872e-05	0.000307599	360	350
BNC1	0.197175	0.000132036	0.000461802	360	254
BNC2	0.380561	3.12649e-14	4.98687e-13	360	369
BNIP1	0.162669	0.00166871	0.00447068	360	371
BNIP2	0.0981605	0.0589066	0.100984	360	371
BNIP3L	0.174836	0.000718834	0.00212283	360	371
BNIP3	-0.258542	4.4375e-07	2.56615e-06	360	371
BNIPL	-0.0546485	0.293793	0.389469	360	369
BOC	0.237735	3.65307e-06	1.77374e-05	360	371
BOD1L	-0.0456672	0.380432	0.478382	360	371
BOD1	0.0567142	0.275897	0.369739	360	371
BOK	-0.127812	0.0137537	0.0285864	360	371
BOLA1	-0.172863	0.000827157	0.00240529	360	371
BOLA2	0.159417	0.00207036	0.00540006	360	371
BOLA3	0.033387	0.521465	0.613369	360	371
BOLL	-0.00489054	0.925204	0.946536	360	88
BOP1	0.0618581	0.234601	0.323912	360	371
BPESC1	-0.115125	0.0265987	0.0507565	360	136
BPGM	-0.0509817	0.327432	0.424294	360	371
BPHL	-0.376673	5.95284e-14	9.17898e-13	360	371
BPIL1	0.148281	0.00420586	0.0101219	360	277
BPIL2	-0.0167795	0.747355	0.807419	360	55
BPIL3	0.159359	0.00207828	0.00541734	360	38
BPI	0.0925721	0.0749331	0.124153	360	280
BPNT1	0.0239621	0.64548	0.722876	360	371
BPTF	0.0130018	0.802899	0.851904	360	371
BPY2	-0.0969778	0.0620384	0.1055	360	106
BRAF	0.00117805	0.981958	0.987859	360	371
BRAP	0.0942029	0.0699267	0.116982	360	371
BRCA1	0.104943	0.0433726	0.0775924	360	371
BRCA2	0.0445871	0.391812	0.490337	360	368
BRCC3	-0.0300434	0.564038	0.651331	360	371
BRD1	0.0741828	0.153867	0.228194	360	371
BRD2	-0.0915438	0.078237	0.128845	360	371
BRD3	0.0492399	0.34425	0.441749	360	371
BRD4	-0.0473814	0.36279	0.460028	360	371
BRD7P3	0.20591	6.45262e-05	0.000242546	360	109
BRD7	0.0857243	0.0992231	0.157709	360	371
BRD8	-0.0406559	0.434939	0.53126	360	371
BRD9	0.157861	0.0022922	0.0059083	360	371
BRDT	0.191331	0.0002096	0.000699909	360	58
BREA2	0.184293	0.000359223	0.00113811	360	320
BRE	0.169998	0.0010115	0.00287216	360	371
BRF1	0.0337807	0.516563	0.608581	360	371
BRF2	-0.0293462	0.573121	0.659717	360	371
BRI3BP	0.0588698	0.258027	0.35026	360	371
BRI3	0.0460545	0.3764	0.474063	360	371
BRIP1	-0.10776	0.0380193	0.0692405	360	368
BRIX1	0.177638	0.000587355	0.001774	360	371
BRMS1L	0.0478915	0.357641	0.455179	360	371
BRMS1	0.177486	0.000593891	0.00179292	360	371
BRP44L	0.00495875	0.924164	0.94591	360	371
BRP44	-0.104703	0.0438562	0.0782819	360	371
BRPF1	0.168692	0.00110758	0.00311611	360	371
BRPF3	-0.213552	3.36325e-05	0.000134193	360	371
BRS3	0.219845	1.93193e-05	8.12371e-05	360	70
BRSK1	0.303368	2.4508e-09	2.0671e-08	360	371
BRSK2	0.0963725	0.0636935	0.107955	360	285
BRWD1	-0.168011	0.00116092	0.00324585	360	371
BRWD3	-0.026068	0.616726	0.698409	360	370
BSCL2	-0.0868274	0.0949341	0.151764	360	371
BSDC1	-0.217873	2.30263e-05	9.55288e-05	360	371
BSG	0.114354	0.027636	0.0524463	360	371
BSND	0.16354	0.00157402	0.00424611	360	164
BSN	-0.126164	0.0150317	0.0308304	360	371
BSPRY	0.132806	0.0104451	0.0224063	360	364
BST1	0.214222	3.17302e-05	0.000127394	360	371
BST2	0.158732	0.00216555	0.00561308	360	371
BSX	-0.0203098	0.6966	0.765665	360	5
BTAF1	-0.0788737	0.129405	0.197519	360	371
BTBD10	0.262713	2.84266e-07	1.70423e-06	360	371
BTBD11	-0.007057	0.89224	0.922807	360	370
BTBD12	0.03809	0.464501	0.559547	360	371
BTBD16	0.0410799	0.43016	0.526811	360	366
BTBD17	0.0882939	0.0894626	0.144489	360	100
BTBD18	0.0659283	0.205169	0.289536	360	214
BTBD19	0.102322	0.04891	0.0860461	360	357
BTBD1	0.178497	0.000551763	0.00167757	360	371
BTBD2	0.0168682	0.746066	0.806508	360	371
BTBD3	0.189075	0.000249623	0.000818061	360	371
BTBD6	0.0171389	0.742133	0.803302	360	371
BTBD7	0.0983161	0.0585047	0.100399	360	371
BTBD8	-0.0583453	0.262299	0.35456	360	276
BTBD9	-0.0917222	0.0776555	0.128057	360	371
BTC	0.0467907	0.368811	0.466416	360	293
BTD	-0.323008	1.86348e-10	1.84331e-09	360	371
BTF3L1	0.000329445	0.994954	0.996254	360	42
BTF3L4	0.256571	5.46213e-07	3.09666e-06	360	371
BTF3	0.0660161	0.204565	0.288806	360	371
BTG1	0.308711	1.23873e-09	1.08954e-08	360	371
BTG2	0.308444	1.28218e-09	1.12378e-08	360	371
BTG3	0.135051	0.00920292	0.0200789	360	371
BTG4	0.058566	0.260496	0.352809	360	19
BTK	0.671933	4.66021e-50	1.85682e-47	360	371
BTLA	0.608159	6.73966e-39	6.74711e-37	360	343
BTN1A1	0.379484	3.74042e-14	5.93286e-13	360	156
BTN2A1	0.172692	0.000837199	0.00243165	360	371
BTN2A2	0.183911	0.000369674	0.00116788	360	371
BTN2A3	0.126424	0.0148233	0.0304639	360	368
BTN3A1	0.076323	0.142304	0.213977	360	371
BTN3A2	0.149148	0.00398657	0.00964426	360	371
BTN3A3	0.0802752	0.122713	0.188619	360	371
BTNL2	0.0769934	0.138822	0.209691	360	23
BTNL3	0.0528167	0.310298	0.406828	360	165
BTNL8	0.0464213	0.372607	0.470113	360	349
BTNL9	-0.320539	2.60329e-10	2.51638e-09	360	371
BTRC	0.0296465	0.5692	0.656227	360	371
BUB1B	0.179783	0.000502219	0.00154116	360	371
BUB1	0.169461	0.00105002	0.00297265	360	371
BUB3	0.142139	0.00609772	0.0140292	360	371
BUD13	0.189404	0.000243379	0.000800364	360	371
BUD31	0.162618	0.00167444	0.00448484	360	371
BVES	0.212155	3.7953e-05	0.000149693	360	363
BYSL	0.0619242	0.234101	0.323333	360	371
BZRAP1	0.0958301	0.0652073	0.110202	360	371
BZW1	0.0237425	0.64851	0.725251	360	371
BZW2	0.200595	0.000100114	0.000359882	360	371
C10orf105	-0.149666	0.00386055	0.00937812	360	369
C10orf107	0.279471	4.39279e-08	3.05243e-07	360	217
C10orf108	0.0315098	0.545163	0.634389	360	368
C10orf10	0.110531	0.0333105	0.0617946	360	371
C10orf110	-0.113845	0.0283399	0.0536374	360	365
C10orf111	0.050872	0.328475	0.425363	360	354
C10orf113	0.157883	0.00228896	0.00590224	360	10
C10orf114	-0.178946	0.000533981	0.0016271	360	371
C10orf116	-0.075899	0.14454	0.216799	360	371
C10orf118	-0.0158926	0.76029	0.818127	360	371
C10orf119	0.0977567	0.0599609	0.102483	360	371
C10orf11	-0.0632746	0.224038	0.311595	360	371
C10orf120	0.011921	0.818987	0.865334	360	5
C10orf122	-0.0359237	0.490303	0.583914	360	8
C10orf125	-0.197008	0.000133816	0.000467452	360	371
C10orf128	0.113323	0.029078	0.0548624	360	346
C10orf129	-0.0228043	0.66152	0.735917	360	166
C10orf12	0.0697743	0.179905	0.25979	360	371
C10orf131	0.052297	0.31509	0.41181	360	155
C10orf137	0.192624	0.000189437	0.000638682	360	371
C10orf140	-0.208068	5.38112e-05	0.000205173	360	371
C10orf18	0.0787858	0.129834	0.19804	360	371
C10orf25	-0.0439042	0.399113	0.497661	360	371
C10orf26	0.00991925	0.848981	0.888508	360	371
C10orf27	0.00608953	0.906941	0.932742	360	43
C10orf28	0.321885	2.17041e-10	2.12476e-09	360	371
C10orf2	0.132688	0.0105139	0.0225297	360	371
C10orf32	-0.217983	2.28022e-05	9.46782e-05	360	371
C10orf35	0.139098	0.00729138	0.016382	360	365
C10orf41	-0.137454	0.00802057	0.0178094	360	371
C10orf46	0.22464	1.25258e-05	5.4556e-05	360	371
C10orf47	-0.113768	0.0284478	0.0538213	360	371
C10orf4	-0.0101495	0.84552	0.885804	360	371
C10orf50	0.0951386	0.06718	0.113075	360	165
C10orf53	0.00451353	0.930955	0.951053	360	6
C10orf54	0.454843	2.41942e-20	6.62082e-19	360	371
C10orf55	0.301017	3.29469e-09	2.736e-08	360	306
C10orf57	-0.215984	2.71984e-05	0.000110962	360	371
C10orf58	-0.319735	2.90102e-10	2.78661e-09	360	371
C10orf62	0.0252695	0.627563	0.707905	360	309
C10orf67	-0.0979443	0.0594692	0.101791	360	147
C10orf68	0.0638142	0.220105	0.307089	360	331
C10orf71	-0.032729	0.529712	0.620724	360	35
C10orf72	-0.180425	0.000479062	0.00147807	360	371
C10orf75	-0.0763468	0.142179	0.213821	360	371
C10orf76	0.0456648	0.380457	0.478382	360	371
C10orf78	0.138995	0.0073352	0.0164693	360	371
C10orf79	-0.0755235	0.146543	0.219357	360	365
C10orf81	0.258387	4.51065e-07	2.60316e-06	360	289
C10orf82	0.18337	0.000384968	0.00121139	360	81
C10orf84	0.0904898	0.0817455	0.133903	360	371
C10orf88	0.0722023	0.165188	0.242297	360	371
C10orf90	0.0989616	0.0568607	0.0979658	360	178
C10orf91	0.256391	5.5661e-07	3.14754e-06	360	158
C10orf93	0.086044	0.0979645	0.15597	360	196
C10orf95	0.0112079	0.829645	0.873348	360	345
C10orf96	-0.0280347	0.590391	0.675342	360	15
C10orf99	-0.0452183	0.385136	0.48341	360	55
C11orf10	0.202248	8.74377e-05	0.000318641	360	371
C11orf16	0.111911	0.0311567	0.0583259	360	133
C11orf17	0.111017	0.0325379	0.0605586	360	371
C11orf1	-0.260271	3.69275e-07	2.16756e-06	360	371
C11orf20	0.0793038	0.127322	0.194876	360	250
C11orf21	0.483262	4.15252e-23	1.38108e-21	360	360
C11orf24	-0.00790706	0.879353	0.912848	360	371
C11orf2	-0.0440602	0.397438	0.495905	360	371
C11orf30	-0.0586245	0.260019	0.352364	360	371
C11orf31	0.129339	0.0126554	0.0265447	360	371
C11orf34	0.0241778	0.642508	0.720359	360	81
C11orf35	-0.226811	1.0262e-05	4.54916e-05	360	371
C11orf36	0.0717523	0.167845	0.245579	360	15
C11orf41	0.326284	1.19019e-10	1.21221e-09	360	316
C11orf42	0.0298936	0.565984	0.653124	360	176
C11orf45	0.458858	1.01986e-20	2.8496e-19	360	369
C11orf46	0.0312992	0.547854	0.636925	360	371
C11orf48	0.165917	0.00134007	0.0036803	360	371
C11orf49	0.287994	1.61806e-08	1.21473e-07	360	371
C11orf51	0.0588296	0.258353	0.350607	360	371
C11orf52	-0.0664369	0.201688	0.285593	360	371
C11orf53	0.172082	0.000874047	0.00252652	360	104
C11orf54	-0.273901	8.28687e-08	5.48475e-07	360	371
C11orf57	-0.0174948	0.736975	0.799239	360	371
C11orf58	-0.0595174	0.252818	0.344433	360	371
C11orf59	0.115356	0.0262943	0.0502816	360	371
C11orf61	0.169345	0.0010585	0.00299368	360	371
C11orf63	0.408801	2.23141e-16	4.37541e-15	360	367
C11orf65	-0.121279	0.0194521	0.0386404	360	360
C11orf66	-0.0728528	0.161403	0.237584	360	371
C11orf67	-0.0868541	0.0948323	0.151625	360	371
C11orf68	0.0570867	0.27275	0.366178	360	371
C11orf70	0.31984	2.8603e-10	2.75013e-09	360	234
C11orf71	-0.256807	5.32801e-07	3.02924e-06	360	371
C11orf73	0.150339	0.0037023	0.0090433	360	371
C11orf74	0.00864619	0.868174	0.903739	360	371
C11orf75	0.0438956	0.399205	0.497744	360	371
C11orf80	0.258908	4.26872e-07	2.47429e-06	360	371
C11orf82	0.179415	0.000515974	0.00157851	360	371
C11orf83	0.082401	0.113081	0.175981	360	371
C11orf84	0.306617	1.62119e-09	1.40607e-08	360	371
C11orf85	-0.0708486	0.173278	0.251937	360	141
C11orf86	0.144131	0.00541368	0.0126098	360	265
C11orf87	0.0414748	0.425737	0.522873	360	74
C11orf88	0.174512	0.000735654	0.00216576	360	159
C11orf90	0.129018	0.0128794	0.0269703	360	62
C11orf92	0.161664	0.00178447	0.00474065	360	369
C11orf93	0.194764	0.00016003	0.000549486	360	367
C11orf94	0.0949662	0.0676793	0.113791	360	23
C11orf95	0.00580938	0.911204	0.935915	360	371
C11orf9	0.112807	0.0298236	0.0560813	360	371
C12orf10	0.0473226	0.363387	0.460638	360	371
C12orf11	0.138186	0.00768827	0.0171773	360	371
C12orf12	-0.0492214	0.344432	0.441897	360	17
C12orf23	0.268515	1.5106e-07	9.51316e-07	360	371
C12orf24	0.0220146	0.67255	0.745411	360	371
C12orf26	0.116745	0.0245267	0.0473974	360	371
C12orf27	-0.0165532	0.75065	0.810539	360	367
C12orf29	-0.223925	1.33697e-05	5.78898e-05	360	371
C12orf32	0.338894	2.01437e-11	2.26853e-10	360	371
C12orf34	-0.0135155	0.795281	0.845758	360	371
C12orf35	-0.0770786	0.138385	0.209093	360	371
C12orf36	0.277654	5.41198e-08	3.69871e-07	360	174
C12orf39	-0.0898164	0.0840524	0.137074	360	312
C12orf40	0.00361292	0.944707	0.961242	360	27
C12orf41	0.148478	0.00415516	0.0100084	360	371
C12orf42	0.212755	3.60385e-05	0.000143048	360	243
C12orf43	-0.00113276	0.982652	0.988307	360	371
C12orf44	0.275702	6.75998e-08	4.54974e-07	360	371
C12orf45	0.00793442	0.878939	0.912557	360	371
C12orf47	0.220344	1.84767e-05	7.79693e-05	360	371
C12orf48	0.152304	0.00327298	0.00810596	360	371
C12orf49	0.372452	1.18622e-13	1.76357e-12	360	371
C12orf4	0.395436	2.45511e-15	4.39844e-14	360	371
C12orf50	-0.0810573	0.119098	0.183936	360	72
C12orf51	-0.116212	0.025193	0.0485017	360	371
C12orf52	-0.0639957	0.218793	0.305644	360	371
C12orf53	0.254661	6.66897e-07	3.71115e-06	360	282
C12orf54	0.112956	0.0296071	0.0557182	360	43
C12orf56	0.0908433	0.0805548	0.13217	360	134
C12orf57	0.121389	0.0193412	0.0384509	360	371
C12orf59	0.20364	7.79459e-05	0.000287403	360	269
C12orf5	0.28181	3.35066e-08	2.38399e-07	360	371
C12orf60	-0.0888829	0.0873374	0.141677	360	371
C12orf61	-0.121083	0.0196507	0.0389883	360	370
C12orf62	0.0746363	0.151359	0.225196	360	371
C12orf63	0.145964	0.0048461	0.0114579	360	228
C12orf65	0.0765662	0.141034	0.212451	360	371
C12orf66	-0.25604	5.77477e-07	3.25446e-06	360	371
C12orf68	0.214397	3.1249e-05	0.000125766	360	369
C12orf69	0.0845279	0.104048	0.164211	360	370
C12orf70	0.346067	7.07063e-12	8.53187e-11	360	261
C12orf71	-0.0134249	0.796622	0.846823	360	142
C12orf72	-0.324198	1.58442e-10	1.58697e-09	360	371
C12orf73	0.00255216	0.960925	0.972841	360	371
C12orf74	0.023387	0.653427	0.729021	360	282
C12orf75	0.308508	1.2715e-09	1.11541e-08	360	371
C12orf76	0.191061	0.000214054	0.000713464	360	371
C12orf77	0.134398	0.00954962	0.0207286	360	12
C13orf15	0.140692	0.00664177	0.0150927	360	371
C13orf16	0.139881	0.00696565	0.0157407	360	284
C13orf18	0.647681	1.68998e-45	3.50706e-43	360	371
C13orf1	-0.177174	0.000607468	0.00182865	360	371
C13orf23	0.271315	1.10739e-07	7.14426e-07	360	371
C13orf26	0.245124	1.76528e-06	9.06626e-06	360	50
C13orf27	-0.188535	0.000260218	0.000848457	360	371
C13orf29	0.133267	0.0101785	0.0218958	360	371
C13orf30	0.197432	0.000129332	0.000453697	360	70
C13orf31	0.144709	0.00522851	0.0122458	360	371
C13orf33	0.367817	2.50011e-13	3.56274e-12	360	356
C13orf34	0.24277	2.23133e-06	1.12595e-05	360	371
C13orf35	-0.0134104	0.796837	0.846915	360	151
C13orf36	0.00461982	0.929333	0.949834	360	40
C13orf37	0.21823	2.23085e-05	9.28217e-05	360	371
C13orf38	0.063877	0.21965	0.30654	360	83
C13orf39	0.0199335	0.701951	0.769932	360	10
C14orf101	0.0433873	0.404692	0.5032	360	371
C14orf102	-0.0196356	0.706198	0.773202	360	371
C14orf104	-0.232715	5.909e-06	2.74852e-05	360	371
C14orf105	0.0915641	0.0781707	0.128757	360	364
C14orf106	0.204884	7.02999e-05	0.000261562	360	371
C14orf109	0.226349	1.07086e-05	4.72717e-05	360	371
C14orf115	0.116208	0.0251978	0.0485061	360	44
C14orf118	0.0790199	0.128694	0.196659	360	371
C14orf119	0.198589	0.000117828	0.000417312	360	371
C14orf126	-0.23656	4.0922e-06	1.9711e-05	360	371
C14orf128	-0.089008	0.0868914	0.141045	360	371
C14orf129	0.252445	8.39145e-07	4.58012e-06	360	371
C14orf132	0.221998	1.59232e-05	6.80297e-05	360	366
C14orf135	0.0503411	0.333555	0.430632	360	371
C14orf138	0.20039	0.000101803	0.000365361	360	371
C14orf139	0.142675	0.00590635	0.0136394	360	371
C14orf142	0.0364543	0.483913	0.578384	360	371
C14orf143	0.119856	0.0209369	0.0412078	360	371
C14orf145	0.125668	0.0154365	0.0315605	360	370
C14orf147	-0.0346907	0.505324	0.598339	360	371
C14orf148	0.0620689	0.233007	0.322024	360	355
C14orf149	0.0163214	0.754028	0.813162	360	370
C14orf153	0.166851	0.00125724	0.00348064	360	371
C14orf156	0.0566319	0.276595	0.370545	360	371
C14orf159	-0.0198224	0.703532	0.771157	360	371
C14orf162	-0.160191	0.00196752	0.00516565	360	287
C14orf165	-0.0866919	0.0954527	0.152434	360	10
C14orf166B	0.106476	0.0403855	0.0730025	360	85
C14orf166	0.167872	0.00117202	0.00326972	360	371
C14orf167	-0.324618	1.49599e-10	1.5052e-09	360	371
C14orf169	0.140898	0.00656163	0.0149365	360	371
C14orf174	0.186973	0.000293247	0.000946083	360	316
C14orf176	-0.10441	0.044454	0.0792211	360	371
C14orf178	0.110309	0.0336681	0.0623171	360	128
C14orf179	0.0380554	0.464907	0.559934	360	371
C14orf180	0.128573	0.0131961	0.0275743	360	211
C14orf181	0.0903091	0.0823592	0.134806	360	371
C14orf182	-0.00437537	0.933063	0.952572	360	359
C14orf183	-0.0678149	0.192472	0.274653	360	51
C14orf184	0.090238	0.0826021	0.13514	360	143
C14orf19	0.0660784	0.204137	0.288345	360	328
C14orf1	-0.215117	2.93456e-05	0.000118705	360	371
C14orf21	-0.236585	4.0825e-06	1.9669e-05	360	371
C14orf23	0.0737138	0.156493	0.231538	360	18
C14orf28	-0.0557518	0.28414	0.378867	360	371
C14orf2	0.0906028	0.0813632	0.133387	360	371
C14orf33	0.0568369	0.274857	0.368511	360	371
C14orf34	0.300688	3.43308e-09	2.84146e-08	360	123
C14orf37	0.188145	0.000268125	0.00087238	360	357
C14orf39	0.149236	0.00396499	0.00959904	360	42
C14orf43	0.19638	0.000140708	0.000488785	360	371
C14orf45	0.00405588	0.937941	0.956228	360	371
C14orf48	0.0741606	0.15399	0.22831	360	48
C14orf49	0.0367015	0.480951	0.575431	360	371
C14orf4	0.0602198	0.247252	0.338214	360	371
C14orf50	0.204882	7.03075e-05	0.000261562	360	292
C14orf53	-0.116383	0.0249778	0.0481524	360	186
C14orf64	0.417414	4.49052e-17	9.46669e-16	360	279
C14orf68	-0.0945516	0.0688925	0.115532	360	369
C14orf70	0.0485641	0.350921	0.448374	360	59
C14orf72	0.336577	2.80889e-11	3.11574e-10	360	278
C14orf73	0.0367433	0.480452	0.574972	360	371
C14orf79	0.127192	0.0142229	0.0294297	360	371
C14orf80	0.303861	2.30246e-09	1.95024e-08	360	371
C14orf86	0.0411843	0.428988	0.525732	360	6
C14orf93	0.0358373	0.491347	0.584954	360	371
C15orf17	0.0933066	0.0726434	0.120832	360	371
C15orf21	0.0980326	0.0592389	0.10144	360	371
C15orf23	0.0448281	0.389255	0.48772	360	371
C15orf24	-0.0624232	0.230346	0.318898	360	371
C15orf26	-0.0946509	0.0686003	0.115116	360	275
C15orf27	0.0413178	0.427492	0.524596	360	369
C15orf28	-0.0562023	0.280261	0.374848	360	282
C15orf29	0.0714065	0.169909	0.24807	360	371
C15orf2	0.0822653	0.113678	0.176666	360	116
C15orf32	0.0493358	0.34331	0.440912	360	7
C15orf33	-0.155893	0.00260382	0.00662326	360	358
C15orf34	-0.0521079	0.316845	0.413453	360	370
C15orf37	-0.191684	0.000203897	0.000683728	360	371
C15orf38	0.0905934	0.0813949	0.133428	360	371
C15orf39	0.39778	1.62468e-15	2.98038e-14	360	371
C15orf40	0.0770457	0.138553	0.209317	360	371
C15orf41	-0.0635798	0.221807	0.30901	360	371
C15orf42	0.224444	1.27521e-05	5.54448e-05	360	371
C15orf43	-0.219669	1.96253e-05	8.24493e-05	360	225
C15orf44	0.0452186	0.385134	0.48341	360	371
C15orf48	0.269301	1.38501e-07	8.77056e-07	360	367
C15orf50	-0.102891	0.0476598	0.0841961	360	161
C15orf51	0.0750059	0.149338	0.222755	360	281
C15orf52	0.131682	0.0111208	0.0236647	360	371
C15orf53	0.324953	1.429e-10	1.44291e-09	360	159
C15orf54	0.070415	0.17593	0.255123	360	184
C15orf55	0.0551697	0.289206	0.384437	360	40
C15orf56	0.188585	0.000259221	0.000845621	360	179
C15orf57	0.282187	3.20714e-08	2.28678e-07	360	371
C15orf58	-0.163439	0.00158472	0.00427209	360	371
C15orf59	0.0915509	0.0782138	0.128817	360	341
C15orf5	-0.0273392	0.599644	0.683453	360	74
C15orf60	-0.0730371	0.160342	0.236251	360	64
C15orf61	-0.0374237	0.472356	0.567192	360	371
C15orf62	-0.0763006	0.142422	0.214121	360	371
C15orf63	-0.00603304	0.9078	0.933319	360	371
C16orf11	0.0820342	0.1147	0.178018	360	57
C16orf13	-0.0155695	0.76502	0.821957	360	371
C16orf3	-0.0918474	0.0772496	0.127543	360	328
C16orf42	0.0549739	0.290924	0.386245	360	371
C16orf45	-0.238523	3.38425e-06	1.65248e-05	360	371
C16orf46	-0.00272947	0.958213	0.970682	360	371
C16orf48	0.146264	0.00475859	0.0112885	360	371
C16orf52	-0.230095	7.56264e-06	3.42883e-05	360	371
C16orf53	0.059264	0.254848	0.346653	360	371
C16orf54	0.582437	4.46266e-35	3.13046e-33	360	371
C16orf55	0.111429	0.031896	0.0594862	360	371
C16orf57	0.284704	2.38874e-08	1.74125e-07	360	371
C16orf58	-0.358272	1.11837e-12	1.47551e-11	360	371
C16orf59	0.179329	0.000519228	0.00158724	360	371
C16orf5	-0.166092	0.0013242	0.00364474	360	371
C16orf61	0.0154613	0.766606	0.823173	360	371
C16orf62	-0.033822	0.516051	0.608114	360	371
C16orf63	-0.105834	0.0416144	0.0749247	360	371
C16orf68	0.107895	0.037778	0.0688765	360	371
C16orf70	-0.182593	0.000407969	0.00127671	360	371
C16orf71	-0.207736	5.53405e-05	0.00021048	360	370
C16orf72	0.0166851	0.74873	0.808786	360	371
C16orf73	-0.0776392	0.13553	0.205359	360	241
C16orf74	0.222488	1.52331e-05	6.52773e-05	360	367
C16orf75	0.209268	4.85998e-05	0.000187274	360	371
C16orf78	-0.00123692	0.981056	0.987251	360	4
C16orf79	0.14146	0.00634768	0.0145254	360	370
C16orf7	0.0043986	0.932709	0.952405	360	371
C16orf80	-0.120781	0.019961	0.0395292	360	371
C16orf81	0.0244781	0.638383	0.717087	360	156
C16orf82	0.077853	0.134454	0.203974	360	9
C16orf86	0.0135289	0.795082	0.845637	360	371
C16orf87	-0.0210429	0.686219	0.75655	360	371
C16orf88	0.191954	0.000199641	0.000670021	360	371
C16orf89	0.19487	0.000158687	0.000545628	360	333
C16orf90	0.113523	0.0287929	0.0544018	360	36
C16orf91	0.13748	0.00800814	0.0177857	360	371
C16orf92	0.0142934	0.783781	0.836793	360	54
C16orf93	0.293067	8.78769e-09	6.86274e-08	360	369
C17orf100	0.147844	0.00432031	0.0103698	360	371
C17orf101	-0.0307294	0.555169	0.643533	360	371
C17orf102	0.202832	8.33322e-05	0.000305286	360	83
C17orf103	-0.0442098	0.395836	0.49441	360	371
C17orf104	0.02667	0.608611	0.691618	360	367
C17orf105	-0.0396551	0.446339	0.542292	360	29
C17orf106	-0.0274047	0.598771	0.682733	360	371
C17orf107	0.00341525	0.947728	0.963347	360	371
C17orf108	-0.187286	0.000286341	0.000925601	360	371
C17orf28	0.364139	4.47985e-13	6.19775e-12	360	371
C17orf37	-0.0181605	0.727357	0.791005	360	371
C17orf39	-0.269679	1.32822e-07	8.45123e-07	360	371
C17orf42	0.103853	0.0456073	0.0809721	360	371
C17orf44	-0.0261671	0.615387	0.697289	360	371
C17orf46	0.0974587	0.0607488	0.103652	360	237
C17orf47	-0.168314	0.0011369	0.00318826	360	333
C17orf48	0.0410686	0.430288	0.526903	360	371
C17orf49	0.338675	2.07893e-11	2.33859e-10	360	371
C17orf50	0.106535	0.0402742	0.0728211	360	114
C17orf51	0.0577624	0.267105	0.35986	360	370
C17orf53	0.171245	0.000927058	0.00265815	360	371
C17orf54	-0.181171	0.00045337	0.00140555	360	86
C17orf55	-0.126628	0.0146618	0.0301789	360	371
C17orf56	0.0904459	0.0818943	0.134136	360	371
C17orf57	-0.113724	0.0285094	0.0539121	360	366
C17orf58	-0.176433	0.000640892	0.00191537	360	371
C17orf59	0.18542	0.000329947	0.00105357	360	371
C17orf60	0.583223	3.45031e-35	2.46369e-33	360	369
C17orf61	-0.025145	0.62926	0.709377	360	371
C17orf62	0.198314	0.000120475	0.00042555	360	371
C17orf63	0.246134	1.59542e-06	8.2706e-06	360	371
C17orf64	0.148286	0.0042046	0.0101201	360	175
C17orf65	-0.0238402	0.64716	0.724107	360	371
C17orf66	0.242367	2.32206e-06	1.1673e-05	360	186
C17orf67	0.204759	7.10315e-05	0.000264003	360	370
C17orf68	0.147772	0.00433957	0.0104085	360	371
C17orf69	0.264598	2.31874e-07	1.41093e-06	360	363
C17orf70	-0.0481794	0.354754	0.452251	360	371
C17orf71	-0.0172708	0.740221	0.801755	360	371
C17orf72	0.318768	3.30255e-10	3.145e-09	360	371
[truncated: 17,923 more rows]
[truncated: 2 more columns]

## Sheet: positive genes
Query	Statistic	P-value	FDR (BH)	Event_SD	Event_TD
ABI3	0.610927	2.4913e-39	2.57159e-37	360	371
ABR	0.509303	7.03416e-26	2.76399e-24	360	371
ACAP1	0.681556	5.45245e-52	2.78522e-49	360	371
ADAM28	0.593324	1.18607e-36	9.84534e-35	360	355
ADAM6	0.606685	1.14028e-38	1.11905e-36	360	371
ADAM8	0.572173	1.20649e-33	7.44141e-32	360	371
ADAMDEC1	0.615431	4.83038e-40	5.34616e-38	360	342
ADAP2	0.549051	1.34737e-30	6.77837e-29	360	371
ADCY7	0.557475	1.11315e-31	5.99354e-30	360	371
AIF1	0.643513	9.33671e-45	1.77149e-42	360	371
AIM2	0.633382	5.3323e-43	7.8689e-41	360	334
ALOX5AP	0.684035	1.68657e-52	9.59995e-50	360	371
ALOX5	0.523256	1.82621e-27	7.97846e-26	360	371
AMICA1	0.541256	1.27235e-29	6.04958e-28	360	371
AMPD3	0.514292	1.94398e-26	7.83966e-25	360	371
ANO9	0.575125	4.72961e-34	2.99122e-32	360	366
AOAH	0.64341	9.73524e-45	1.82967e-42	360	371
APOB48R	0.584475	2.28638e-35	1.68078e-33	360	371
APOBEC3C	0.564651	1.25749e-32	7.26136e-31	360	371
APOBEC3D	0.514558	1.81399e-26	7.3303e-25	360	371
APOBEC3G	0.579482	1.16693e-34	7.74921e-33	360	371
ARHGAP15	0.619301	1.15522e-40	1.34586e-38	360	371
ARHGAP22	0.573732	7.3672e-34	4.58654e-32	360	371
ARHGAP25	0.613243	1.07539e-39	1.16434e-37	360	371
ARHGAP30	0.634554	3.36555e-43	5.15758e-41	360	371
ARHGAP9	0.713582	5.44018e-59	1.80632e-55	360	371
ARHGDIB	0.652913	1.90442e-46	4.51665e-44	360	371
ARL11	0.570057	2.34693e-33	1.42983e-31	360	371
ARL4C	0.593144	1.26081e-36	1.04223e-34	360	371
ARPC2	0.581215	6.6477e-35	4.58254e-33	360	371
ARRDC5	0.515005	1.61444e-26	6.62208e-25	360	302
ASB2	0.627867	4.52896e-42	6.09635e-40	360	369
ATP2A3	0.58052	8.33391e-35	5.6859e-33	360	371
AXL	0.536805	4.46705e-29	2.07927e-27	360	371
BASP1	0.504885	2.15884e-25	8.2234e-24	360	371
BATF3	0.58951	4.29423e-36	3.39483e-34	360	369
BATF	0.523998	1.49685e-27	6.58282e-26	360	371
BCAS4	0.541009	1.36484e-29	6.47391e-28	360	371
BCL11B	0.63744	1.07403e-43	1.79806e-41	360	369
BCL2A1	0.55424	2.92505e-31	1.52947e-29	360	371
BIN2	0.674273	1.60441e-50	7.10291e-48	360	371
BTK	0.671933	4.66021e-50	1.85682e-47	360	371
BTLA	0.608159	6.73966e-39	6.74711e-37	360	343
C13orf18	0.647681	1.68998e-45	3.50706e-43	360	371
C16orf54	0.582437	4.46266e-35	3.13046e-33	360	371
C17orf60	0.583223	3.45031e-35	2.46369e-33	360	369
C17orf87	0.56896	3.30719e-33	1.98451e-31	360	370
C1QA	0.584454	2.30269e-35	1.68655e-33	360	371
C1QB	0.59356	1.09504e-36	9.1278e-35	360	371
C1QC	0.588493	6.03288e-36	4.67654e-34	360	371
C1orf162	0.631213	1.24339e-42	1.79498e-40	360	371
C1orf38	0.650449	5.35255e-46	1.18482e-43	360	371
C1orf54	0.563969	1.55023e-32	8.84918e-31	360	371
C20orf103	0.542819	8.14923e-30	3.94051e-28	360	331
C3AR1	0.587466	8.49613e-36	6.4603e-34	360	371
C5orf20	0.601452	7.21789e-38	6.59609e-36	360	358
CAMK4	0.526752	7.12451e-28	3.17527e-26	360	327
CARD11	0.630451	1.67099e-42	2.34433e-40	360	371
CARD16	0.5101	5.73546e-26	2.2671e-24	360	371
CARD9	0.686603	4.9363e-53	3.07316e-50	360	371
CCDC136	0.502719	3.71863e-25	1.40574e-23	360	346
CCDC88B	0.57195	1.29458e-33	7.96008e-32	360	371
CCL19	0.550746	8.20384e-31	4.17997e-29	360	356
CCL22	0.593111	1.27539e-36	1.04993e-34	360	357
CCL4L2	0.508048	9.6883e-26	3.78452e-24	360	371
CCL4	0.576865	2.7112e-34	1.75937e-32	360	371
CCL5	0.599807	1.28017e-37	1.13856e-35	360	371
CCR1	0.533524	1.11433e-28	5.11513e-27	360	371
CCR2	0.554644	2.59343e-31	1.36684e-29	360	370
CCR5	0.665485	8.36624e-49	2.77787e-46	360	371
CCR7	0.583444	3.20853e-35	2.29929e-33	360	370
CD101	0.595023	6.65043e-37	5.68626e-35	360	370
CD180	0.627065	6.16023e-42	8.12742e-40	360	371
CD1A	0.613636	9.31675e-40	1.01983e-37	360	264
CD1B	0.555181	2.21048e-31	1.18062e-29	360	274
CD1C	0.555066	2.28799e-31	1.21227e-29	360	361
CD1E	0.560703	4.20105e-32	2.31838e-30	360	344
CD200R1	0.550586	8.59814e-31	4.3697e-29	360	366
CD207	0.502619	3.81311e-25	1.43873e-23	360	319
CD247	0.606536	1.20254e-38	1.16864e-36	360	371
CD27	0.649317	8.57997e-46	1.87835e-43	360	371
CD2	0.651523	3.41569e-46	8.00557e-44	360	371
CD300A	0.658191	2.01348e-47	5.57118e-45	360	371
CD300C	0.585148	1.83171e-35	1.36671e-33	360	365
CD300LF	0.662673	2.88156e-48	8.83177e-46	360	371
CD33	0.625917	9.55153e-42	1.21978e-39	360	371
CD37	0.695855	5.30836e-55	5.56596e-52	360	371
CD3D	0.660137	8.69035e-48	2.47327e-45	360	371
CD3E	0.662185	3.56744e-48	1.06076e-45	360	371
CD3G	0.597058	3.31142e-37	2.85585e-35	360	354
CD40LG	0.53396	9.87532e-29	4.54356e-27	360	366
CD48	0.694601	9.91321e-55	9.87455e-52	360	371
CD4	0.517638	8.10686e-27	3.40727e-25	360	371
CD52	0.689706	1.10011e-53	7.82725e-51	360	371
CD53	0.686357	5.55609e-53	3.35419e-50	360	371
CD5	0.639478	4.76182e-44	8.17802e-42	360	371
CD69	0.552194	5.35909e-31	2.78031e-29	360	370
CD6	0.661593	4.61653e-48	1.35251e-45	360	371
CD70	0.56807	4.36478e-33	2.59568e-31	360	325
CD72	0.607991	7.15543e-39	7.12753e-37	360	371
CD74	0.539678	1.99032e-29	9.39601e-28	360	371
CD79A	0.615815	4.19472e-40	4.72131e-38	360	363
CD79B	0.532677	1.40848e-28	6.42101e-27	360	371
CD80	0.574549	5.68216e-34	3.58228e-32	360	363
CD83	0.517186	9.12869e-27	3.81261e-25	360	371
CD84	0.514866	1.6743e-26	6.80723e-25	360	370
CD86	0.683058	2.68127e-52	1.48379e-49	360	371
CD8A	0.573989	6.7903e-34	4.26739e-32	360	371
CD8B	0.587271	9.0672e-36	6.86832e-34	360	368
CD96	0.629239	2.67052e-42	3.69459e-40	360	371
CD97	0.510482	5.20067e-26	2.0639e-24	360	371
CEACAM21	0.505761	1.73068e-25	6.65609e-24	360	370
CEACAM4	0.585122	1.84719e-35	1.37312e-33	360	335
CELF2	0.621416	5.24137e-41	6.36698e-39	360	371
CERKL	0.605908	1.50282e-38	1.43939e-36	360	371
CHI3L2	0.542384	9.22684e-30	4.44003e-28	360	334
CHST2	0.508664	8.27998e-26	3.24712e-24	360	371
CIITA	0.552151	5.4264e-31	2.80064e-29	360	371
CLEC10A	0.569126	3.14092e-33	1.90193e-31	360	371
CLEC12A	0.592061	1.81961e-36	1.48498e-34	360	368
CLEC2B	0.520947	3.38092e-27	1.44849e-25	360	371
CLEC4A	0.693639	1.59705e-54	1.38332e-51	360	371
CLEC4E	0.58286	3.8855e-35	2.7547e-33	360	361
CLEC7A	0.622001	4.20728e-41	5.17392e-39	360	370
CLECL1	0.591874	1.93819e-36	1.56326e-34	360	333
CMKLR1	0.589303	4.60213e-36	3.60959e-34	360	371
CMTM3	0.55685	1.34283e-31	7.21076e-30	360	371
CMTM7	0.583676	2.97335e-35	2.16187e-33	360	371
COL8A2	0.58002	9.80331e-35	6.62039e-33	360	369
CORO1A	0.715459	1.97372e-59	9.83011e-56	360	371
COTL1	0.71135	1.79629e-58	4.47322e-55	360	371
CR1	0.55131	6.95242e-31	3.56057e-29	360	367
CRIP1	0.547264	2.26615e-30	1.12584e-28	360	371
CRTAM	0.604007	2.94378e-38	2.76632e-36	360	361
CSF1R	0.62103	6.05596e-41	7.31193e-39	360	371
CSF2RB	0.651161	3.97421e-46	8.99708e-44	360	371
CSF3R	0.582468	4.41688e-35	3.1093e-33	360	371
CST7	0.595072	6.54089e-37	5.61671e-35	360	371
CTLA4	0.642599	1.3534e-44	2.51985e-42	360	357
CTSC	0.501425	5.13729e-25	1.92378e-23	360	371
CXCR3	0.610469	2.93949e-39	3.0031e-37	360	371
CXCR4	0.622775	3.14395e-41	3.91461e-39	360	371
CXCR5	0.583657	2.99242e-35	2.16782e-33	360	336
CXCR6	0.585685	1.53374e-35	1.15303e-33	360	369
CXorf21	0.565141	1.08127e-32	6.26192e-31	360	368
CYBA	0.514728	1.7355e-26	7.02737e-25	360	371
CYBB	0.641743	1.91389e-44	3.46622e-42	360	371
CYTH4	0.667702	3.12425e-49	1.14202e-46	360	371
CYTIP	0.673261	2.54783e-50	1.07664e-47	360	371
DAPP1	0.668646	2.0497e-49	7.70457e-47	360	369
DEF6	0.689771	1.06606e-53	7.82725e-51	360	371
DENND3	0.508353	8.96484e-26	3.50879e-24	360	371
DGKA	0.606553	1.19519e-38	1.16718e-36	360	371
DNAJC5B	0.509907	6.02712e-26	2.37767e-24	360	356
DOCK2	0.663037	2.45736e-48	7.64929e-46	360	371
DOK1	0.619754	9.75712e-41	1.14342e-38	360	371
DOK2	0.663796	1.76102e-48	5.65856e-46	360	371
DOK3	0.665047	1.01499e-48	3.31486e-46	360	371
DPEP2	0.587992	7.13192e-36	5.4647e-34	360	371
DSE	0.509572	6.56563e-26	2.58499e-24	360	371
DUSP2	0.616035	3.86965e-40	4.38018e-38	360	371
EBI3	0.616482	3.28135e-40	3.73548e-38	360	371
ELF4	0.541429	1.21114e-29	5.78619e-28	360	371
EMB	0.614984	5.69207e-40	6.26505e-38	360	371
EMILIN2	0.563367	1.86477e-32	1.05268e-30	360	371
EMP3	0.61346	9.937e-40	1.08177e-37	360	371
EMR2	0.637385	1.09816e-43	1.82312e-41	360	371
ENO2	0.541265	1.26915e-29	6.04878e-28	360	371
ENTPD1	0.519469	5.00292e-27	2.13422e-25	360	371
EPB41L3	0.526152	8.37871e-28	3.72591e-26	360	371
ERMN	0.510852	4.72878e-26	1.88037e-24	360	316
EVI2A	0.662552	3.0386e-48	9.17197e-46	360	371
EVI2B	0.657049	3.28644e-47	8.50291e-45	360	371
FAIM3	0.601139	8.05015e-38	7.32306e-36	360	371
FAM105A	0.572403	1.12193e-33	6.94133e-32	360	371
FAM113B	0.505794	1.71628e-25	6.6135e-24	360	371
FAM26F	0.651055	4.15523e-46	9.30117e-44	360	371
FAM78A	0.642225	1.57437e-44	2.90413e-42	360	371
FCER1G	0.592264	1.69888e-36	1.3928e-34	360	371
FCGR1A	0.608811	5.33564e-39	5.39577e-37	360	368
FCGR1B	0.616868	2.84619e-40	3.25872e-38	360	371
FCGR1C	0.555886	1.79148e-31	9.59404e-30	360	361
FCGR2A	0.506157	1.56571e-25	6.04498e-24	360	371
FCHO1	0.594448	8.09391e-37	6.80883e-35	360	371
FCN1	0.542059	1.01243e-29	4.86014e-28	360	371
FCRL2	0.548826	1.43862e-30	7.2192e-29	360	245
FCRL5	0.608244	6.5364e-39	6.57668e-37	360	301
FERMT3	0.71421	3.87966e-59	1.54581e-55	360	371
FGD2	0.605226	1.91408e-38	1.82451e-36	360	371
FGD3	0.643915	7.92462e-45	1.54779e-42	360	371
FGL2	0.59204	1.8324e-36	1.48498e-34	360	371
FGR	0.626592	7.38047e-42	9.54765e-40	360	371
FLJ40330	0.517562	8.26954e-27	3.46833e-25	360	312
FLT3	0.506209	1.5453e-25	5.97776e-24	360	347
FMNL1	0.612457	1.43122e-39	1.51664e-37	360	371
FMNL3	0.507941	9.95708e-26	3.8819e-24	360	371
FPR1	0.594936	6.85157e-37	5.8332e-35	360	370
FPR2	0.505309	1.94007e-25	7.43272e-24	360	310
FPR3	0.562223	2.64552e-32	1.47218e-30	360	371
FUT7	0.671971	4.5806e-50	1.85682e-47	360	347
FUT8	0.521125	3.22483e-27	1.38459e-25	360	371
FXYD5	0.518792	5.98266e-27	2.5305e-25	360	371
FYB	0.626626	7.28535e-42	9.48619e-40	360	371
FZD2	0.564151	1.4662e-32	8.39357e-31	360	371
GAB3	0.644421	6.44794e-45	1.27494e-42	360	371
GAL3ST4	0.520241	4.07741e-27	1.74314e-25	360	371
GALNT6	0.522212	2.41429e-27	1.0456e-25	360	371
GAPT	0.585873	1.44132e-35	1.08765e-33	360	349
GAS7	0.607936	7.29803e-39	7.21073e-37	360	371
GATA3	0.543491	6.72343e-30	3.27492e-28	360	367
GBGT1	0.535376	6.66024e-29	3.0857e-27	360	371
GBP5	0.594445	8.10005e-37	6.80883e-35	360	371
GCET2	0.594371	8.30886e-37	6.955e-35	360	354
GLIPR2	0.62234	3.70266e-41	4.58164e-39	360	371
GMFG	0.600734	9.27275e-38	8.3589e-36	360	371
GMIP	0.576309	3.23981e-34	2.08879e-32	360	371
GNA15	0.684852	1.14253e-52	6.69456e-50	360	371
GNB4	0.534678	8.08967e-29	3.73927e-27	360	371
GNG2	0.56654	7.01962e-33	4.12029e-31	360	371
GNGT2	0.620637	7.01656e-41	8.42072e-39	360	370
GPBAR1	0.515535	1.40608e-26	5.83584e-25	360	371
GPR132	0.710076	3.53619e-58	7.82756e-55	360	371
GPR171	0.571665	1.4162e-33	8.68111e-32	360	364
GPR183	0.599376	1.48677e-37	1.31642e-35	360	371
GPR18	0.533145	1.23744e-28	5.6672e-27	360	361
GPR55	0.585201	1.79982e-35	1.34797e-33	360	340
GPR65	0.643684	8.70915e-45	1.6683e-42	360	371
GPR68	0.610194	3.24542e-39	3.29873e-37	360	371
GPR84	0.633217	5.68776e-43	8.33173e-41	360	328
GPSM3	0.735146	2.83755e-64	2.82648e-60	360	371
GSTP1	0.53138	2.0139e-28	9.16003e-27	360	371
GZMA	0.562257	2.61771e-32	1.46079e-30	360	371
GZMK	0.573583	7.72266e-34	4.79286e-32	360	369
GZMM	0.522536	2.21401e-27	9.63047e-26	360	370
HAPLN3	0.682684	3.20169e-52	1.72389e-49	360	371
HAVCR2	0.621485	5.10674e-41	6.2415e-39	360	371
HCK	0.708492	8.16267e-58	1.47833e-54	360	371
HCLS1	0.6874	3.36412e-53	2.234e-50	360	371
HCST	0.602099	5.75636e-38	5.30917e-36	360	371
HDAC7	0.532948	1.30702e-28	5.97213e-27	360	371
HK3	0.573895	6.99594e-34	4.3828e-32	360	370
HLA-DMB	0.613165	1.10623e-39	1.19126e-37	360	371
HLA-DOA	0.640188	3.58015e-44	6.20206e-42	360	371
HLA-DPA1	0.613131	1.12022e-39	1.19984e-37	360	371
HLA-DPB1	0.634315	3.6971e-43	5.62241e-41	360	371
HLA-DPB2	0.567772	4.78851e-33	2.83919e-31	360	273
HLA-DQA1	0.599263	1.54592e-37	1.36274e-35	360	371
HLA-DQA2	0.566447	7.22463e-33	4.2208e-31	360	370
HLA-DQB1	0.568625	3.67158e-33	2.19655e-31	360	371
HLA-DQB2	0.647554	1.78161e-45	3.65909e-43	360	367
HLA-DRA	0.589535	4.25843e-36	3.37994e-34	360	371
HLA-DRB1	0.519243	5.31022e-27	2.26048e-25	360	371
HPSE	0.551813	5.99485e-31	3.07808e-29	360	367
HVCN1	0.598394	2.08882e-37	1.82515e-35	360	371
ICOS	0.637103	1.22812e-43	1.97311e-41	360	359
IGJ	0.566717	6.64463e-33	3.9164e-31	360	369
IGSF6	0.583642	3.00705e-35	2.17053e-33	360	371
IKBKE	0.523602	1.66471e-27	7.28886e-26	360	371
IKZF1	0.671165	6.59724e-50	2.57706e-47	360	371
IL10RA	0.578861	1.42633e-34	9.44031e-33	360	371
IL12RB1	0.657783	2.39914e-47	6.37276e-45	360	371
IL16	0.560185	4.91541e-32	2.69116e-30	360	371
IL18BP	0.63093	1.38757e-42	1.98872e-40	360	371
IL18RAP	0.542397	9.19277e-30	4.43434e-28	360	371
IL18	0.636776	1.39827e-43	2.2285e-41	360	371
IL1B	0.539417	2.14263e-29	1.00911e-27	360	366
IL21R	0.701025	3.90741e-56	5.18956e-53	360	362
IL22RA2	0.522396	2.29846e-27	9.97602e-26	360	119
IL2RA	0.630685	1.5261e-42	2.15624e-40	360	356
IL2RB	0.531016	2.22605e-28	1.01019e-26	360	371
IL2RG	0.691291	5.07462e-54	4.04386e-51	360	371
IL4I1	0.575632	4.02351e-34	2.57737e-32	360	371
IMPDH1	0.517514	8.37462e-27	3.50503e-25	360	371
INPP5D	0.665745	7.45545e-49	2.51742e-46	360	371
INSL3	0.515329	1.48399e-26	6.14637e-25	360	277
IPCEF1	0.653627	1.40851e-46	3.42677e-44	360	370
IQGAP1	0.501369	5.20884e-25	1.94691e-23	360	371
IRF4	0.56281	2.21116e-32	1.24437e-30	360	364
ITGA4	0.545991	3.27556e-30	1.61125e-28	360	371
ITGAX	0.629483	2.43071e-42	3.38634e-40	360	371
ITGB2	0.639241	5.23464e-44	8.91321e-42	360	371
ITK	0.59155	2.16251e-36	1.73716e-34	360	371
JAK3	0.721414	7.49434e-61	4.97674e-57	360	371
JAKMIP1	0.546332	2.96797e-30	1.46356e-28	360	345
KCNK6	0.521645	2.80831e-27	1.21098e-25	360	371
KCNN4	0.655854	5.47414e-47	1.3632e-44	360	366
KCNQ5	0.501496	5.04653e-25	1.89335e-23	360	300
KCTD12	0.518319	6.7774e-27	2.86058e-25	360	371
KIAA0125	0.547458	2.14201e-30	1.06683e-28	360	293
KIAA0748	0.648715	1.10179e-45	2.36021e-43	360	362
KIAA1949	0.505028	2.08253e-25	7.96317e-24	360	371
KLHL6	0.577136	2.48558e-34	1.62353e-32	360	371
KLRB1	0.533981	9.81728e-29	4.52731e-27	360	371
KLRK1	0.51477	1.71627e-26	6.96363e-25	360	371
LAIR1	0.581654	5.76262e-35	4.01409e-33	360	371
LAPTM5	0.690587	7.16024e-54	5.4864e-51	360	371
LAT2	0.527164	6.37158e-28	2.84607e-26	360	371
LAT	0.581295	6.47714e-35	4.48047e-33	360	371
LCK	0.666938	4.39103e-49	1.56211e-46	360	371
LCP1	0.555089	2.27227e-31	1.20715e-29	360	371
LCP2	0.657973	2.21081e-47	6.03339e-45	360	371
LFNG	0.51777	7.83059e-27	3.29812e-25	360	371
LGALS2	0.546335	2.96576e-30	1.46356e-28	360	362
LGALS9	0.578572	1.56581e-34	1.02951e-32	360	371
LILRA4	0.504896	2.15284e-25	8.21625e-24	360	332
LILRA5	0.514953	1.63666e-26	6.66779e-25	360	370
LILRB1	0.638488	7.07484e-44	1.19445e-41	360	371
LILRB2	0.594885	6.97209e-37	5.91055e-35	360	371
LILRB3	0.56207	2.77192e-32	1.53823e-30	360	369
LILRB4	0.601125	8.08936e-38	7.32529e-36	360	371
LIMD2	0.598135	2.28418e-37	1.98714e-35	360	371
LOC100233209	0.643776	8.38742e-45	1.62227e-42	360	359
LOC606724	0.626311	8.21808e-42	1.05626e-39	360	371
LOC96610	0.580963	7.21709e-35	4.95789e-33	360	371
LOXL3	0.587861	7.4496e-36	5.68624e-34	360	371
LPAR5	0.538873	2.49848e-29	1.17117e-27	360	371
LPAR6	0.523886	1.54282e-27	6.77005e-26	360	371
LPCAT4	0.524297	1.38147e-27	6.08884e-26	360	371
LRRK1	0.536285	5.16744e-29	2.39967e-27	360	371
LSP1	0.653624	1.41048e-46	3.42677e-44	360	371
LST1	0.673292	2.51168e-50	1.07664e-47	360	371
LTA	0.636683	1.45094e-43	2.2941e-41	360	363
LTB	0.655946	5.26509e-47	1.32774e-44	360	371
LY86	0.648936	1.0051e-45	2.17648e-43	360	371
LY9	0.635806	2.05349e-43	3.19607e-41	360	369
LYL1	0.544545	4.96945e-30	2.43247e-28	360	371
MAL	0.647954	1.50988e-45	3.19997e-43	360	341
MAP4K1	0.669181	1.61212e-49	6.17627e-47	360	371
2021-03-01	0.50407	2.65035e-25	1.00572e-23	360	367
MARCKS	0.529001	3.8645e-28	1.73398e-26	360	371
MCART6	0.525423	1.02019e-27	4.51647e-26	360	356
MCOLN2	0.600666	9.49459e-38	8.52033e-36	360	362
MEI1	0.637316	1.12856e-43	1.85811e-41	360	369
MFNG	0.562266	2.61076e-32	1.46079e-30	360	371
MGC29506	0.611156	2.29351e-39	2.39221e-37	360	359
MIAT	0.550535	8.72868e-31	4.42475e-29	360	371
MICAL1	0.610853	2.55923e-39	2.62809e-37	360	371
MIR155HG	0.633417	5.25864e-43	7.81811e-41	360	367
MMP12	0.515074	1.58582e-26	6.54093e-25	360	304
MMP25	0.575499	4.19832e-34	2.67217e-32	360	371
MMP9	0.636634	1.47982e-43	2.32133e-41	360	371
MNDA	0.632762	6.79742e-43	9.88454e-41	360	371
MOBKL2A	0.500657	6.21919e-25	2.31154e-23	360	371
MPEG1	0.581932	5.26298e-35	3.67891e-33	360	371
MRC2	0.502537	3.89171e-25	1.46561e-23	360	371
MS4A1	0.565486	9.72246e-33	5.64697e-31	360	340
MS4A4A	0.506627	1.38993e-25	5.39771e-24	360	371
MS4A6A	0.606434	1.24699e-38	1.20595e-36	360	371
MS4A7	0.50019	6.98243e-25	2.59039e-23	360	371
MTHFD2	0.558106	9.20891e-32	4.98532e-30	360	371
MYO1F	0.702578	1.7651e-56	2.70495e-53	360	371
MYO1G	0.699214	9.80722e-56	1.08544e-52	360	371
NAPSB	0.611089	2.34997e-39	2.43834e-37	360	370
NCF1B	0.5841	2.58702e-35	1.88786e-33	360	365
NCF1C	0.563561	1.7572e-32	9.97346e-31	360	362
NCF1	0.644415	6.46367e-45	1.27494e-42	360	371
NCF2	0.537906	3.28005e-29	1.53033e-27	360	371
NCF4	0.673221	2.59405e-50	1.07664e-47	360	371
NCKAP1L	0.677994	2.8864e-51	1.36912e-48	360	371
NCR3	0.563719	1.67391e-32	9.52787e-31	360	363
NFAM1	0.64586	3.57847e-45	7.20104e-43	360	371
NFE2L3	0.519104	5.50865e-27	2.33994e-25	360	371
NLRC3	0.588895	5.27506e-36	4.10507e-34	360	371
NLRC4	0.575845	3.75898e-34	2.41569e-32	360	371
NLRP3	0.58846	6.09982e-36	4.7101e-34	360	370
ORAI2	0.562573	2.37715e-32	1.33402e-30	360	371
OSCAR	0.619953	9.06023e-41	1.06804e-38	360	371
OSM	0.530036	2.91203e-28	1.31252e-26	360	368
P2RX1	0.544262	5.3894e-30	2.63156e-28	360	368
P2RY10	0.579873	1.02797e-34	6.90698e-33	360	344
P2RY13	0.589946	3.70978e-36	2.95625e-34	360	371
P2RY6	0.571007	1.74206e-33	1.06458e-31	360	371
PARVG	0.709731	4.24486e-58	8.45661e-55	360	371
PBX4	0.56119	3.62309e-32	2.00498e-30	360	343
PDCD1	0.582521	4.34164e-35	3.06717e-33	360	365
PDE6G	0.512061	3.46382e-26	1.38289e-24	360	371
PIK3CD	0.693706	1.54494e-54	1.38332e-51	360	371
PIK3R5	0.651378	3.62991e-46	8.40874e-44	360	371
PIK3R6	0.56904	3.22589e-33	1.94158e-31	360	371
PILRA	0.61812	1.79118e-40	2.07465e-38	360	371
PLA2G2D	0.61303	1.16223e-39	1.23818e-37	360	343
PLAC8	0.553101	4.09939e-31	2.13233e-29	360	363
PLAUR	0.589148	4.84812e-36	3.78762e-34	360	371
PLAU	0.530949	2.26756e-28	1.02669e-26	360	371
PLB1	0.548113	1.77107e-30	8.86515e-29	360	371
PLCB2	0.676582	5.54985e-51	2.51282e-48	360	371
PLD4	0.546604	2.74407e-30	1.35989e-28	360	362
PLEKHO1	0.66599	6.68948e-49	2.29772e-46	360	371
PLEKHO2	0.615469	4.76309e-40	5.30114e-38	360	371
PLEK	0.602395	5.18963e-38	4.80873e-36	360	371
PNOC	0.564575	1.28704e-32	7.41055e-31	360	243
POU2AF1	0.579493	1.16267e-34	7.74672e-33	360	369
POU2F2	0.626976	6.37339e-42	8.35333e-40	360	371
PRAM1	0.580857	7.4709e-35	5.11461e-33	360	369
PRDM1	0.560584	4.35538e-32	2.3969e-30	360	371
PRDM8	0.576761	2.80325e-34	1.81319e-32	360	345
PRKCB	0.641329	2.26168e-44	4.02296e-42	360	371
PRKCQ	0.60042	1.03426e-37	9.23967e-36	360	369
PSTPIP1	0.693792	1.48071e-54	1.38332e-51	360	371
PTAFR	0.515266	1.50819e-26	6.23363e-25	360	370
PTGER2	0.551913	5.82193e-31	2.99702e-29	360	369
PTGER4	0.57699	2.60524e-34	1.69613e-32	360	371
PTPLAD2	0.607931	7.31135e-39	7.21073e-37	360	371
PTPN22	0.62332	2.55885e-41	3.20612e-39	360	369
PTPN6	0.514995	1.61879e-26	6.62208e-25	360	371
PTPN7	0.702005	2.36839e-56	3.37022e-53	360	371
PTPRCAP	0.624281	1.77889e-41	2.24298e-39	360	371
PTPRC	0.57728	2.37344e-34	1.55538e-32	360	371
PTPRO	0.553155	4.0338e-31	2.1037e-29	360	369
PYHIN1	0.554602	2.62645e-31	1.38058e-29	360	366
RAB31	0.527971	5.11709e-28	2.29085e-26	360	371
RAB33A	0.633964	4.24291e-43	6.40359e-41	360	365
RAB42	0.513407	2.44575e-26	9.80367e-25	360	363
RAC2	0.693414	1.78461e-54	1.48137e-51	360	371
RASAL3	0.641655	1.98314e-44	3.5593e-42	360	371
RASGRP1	0.617373	2.36193e-40	2.71991e-38	360	368
RASGRP4	0.500167	7.02244e-25	2.60039e-23	360	371
RASSF2	0.563366	1.86525e-32	1.05268e-30	360	371
RCSD1	0.549589	1.15145e-30	5.82213e-29	360	371
RELT	0.592038	1.83368e-36	1.48498e-34	360	371
RGL4	0.55963	5.81444e-32	3.1625e-30	360	353
RGS10	0.689099	1.47796e-53	1.01531e-50	360	371
RGS1	0.58802	7.06452e-36	5.43395e-34	360	370
RGS2	0.51893	5.76809e-27	2.44493e-25	360	371
RHOH	0.660157	8.6167e-48	2.47327e-45	360	371
RIPK3	0.568228	4.15503e-33	2.47834e-31	360	371
RLTPR	0.641001	2.58204e-44	4.55217e-42	360	369
RNASE6	0.641894	1.80054e-44	3.29086e-42	360	371
RTN1	0.50685	1.31369e-25	5.11157e-24	360	371
RUNX2	0.566911	6.25644e-33	3.69854e-31	360	368
RUNX3	0.677079	4.4098e-51	2.04307e-48	360	371
S100A11	0.504263	2.52473e-25	9.59881e-24	360	371
S100A4	0.666013	6.62174e-49	2.29772e-46	360	371
S100A6	0.513459	2.41322e-26	9.69276e-25	360	371
S100B	1	1e-64	1e-60	360	360
S1PR4	0.60336	3.69696e-38	3.44163e-36	360	371
SAMD3	0.541617	1.14805e-29	5.49796e-28	360	368
SAMSN1	0.633916	4.32497e-43	6.47834e-41	360	371
SASH3	0.700676	4.6695e-56	5.47211e-53	360	371
SDC3	0.530074	2.88199e-28	1.30193e-26	360	371
SELPLG	0.704405	6.88433e-57	1.14291e-53	360	371
SEMA4A	0.637177	1.19267e-43	1.93174e-41	360	371
SEMA4D	0.612093	1.63357e-39	1.7219e-37	360	371
2021-09-01	0.56905	3.21603e-33	1.94151e-31	360	371
SFT2D1	0.539291	2.22013e-29	1.04315e-27	360	371
SFXN3	0.505556	1.82265e-25	6.99629e-24	360	371
SH2D1A	0.579868	1.0297e-34	6.90698e-33	360	370
SH2D2A	0.628525	3.51688e-42	4.79886e-40	360	369
SH3BP1	0.581517	6.02506e-35	4.18227e-33	360	371
SIDT1	0.538755	2.58272e-29	1.20781e-27	360	370
SIGLEC10	0.682436	3.60046e-52	1.88759e-49	360	371
SIGLEC1	0.515	1.61652e-26	6.62208e-25	360	371
SIGLEC5	0.543391	6.91876e-30	3.36184e-28	360	367
SIGLEC7	0.583467	3.18498e-35	2.29066e-33	360	371
SIGLEC9	0.601832	6.31944e-38	5.80165e-36	360	371
SIRPG	0.620334	7.85787e-41	9.31813e-39	360	367
SIT1	0.627151	5.96089e-42	7.91685e-40	360	369
SLA2	0.580164	9.35507e-35	6.36081e-33	360	371
SLAMF1	0.663353	2.13968e-48	6.76613e-46	360	364
SLAMF6	0.60366	3.32678e-38	3.11156e-36	360	371
SLAMF7	0.65862	1.67402e-47	4.69716e-45	360	371
SLAMF8	0.712645	8.99651e-59	2.56041e-55	360	371
SLA	0.681239	6.32964e-52	3.15248e-49	360	371
SLC37A2	0.51502	1.60837e-26	6.62023e-25	360	371
SLC7A7	0.628492	3.56135e-42	4.82647e-40	360	371
SLC9A9	0.560184	4.91709e-32	2.69116e-30	360	371
SNAI3	0.521498	2.92056e-27	1.25666e-25	360	370
SNX20	0.578598	1.55278e-34	1.02432e-32	360	368
SP140	0.560071	5.08816e-32	2.77716e-30	360	371
SPHK1	0.524962	1.15508e-27	5.10235e-26	360	371
SPI1	0.687209	3.68748e-53	2.36974e-50	360	371
SPIB	0.606301	1.30729e-38	1.25816e-36	360	326
SPN	0.647811	1.60189e-45	3.35925e-43	360	371
SPOCK2	0.566534	7.03191e-33	4.12029e-31	360	371
SRGN	0.579684	1.09317e-34	7.30812e-33	360	371
ST8SIA1	0.569578	2.72701e-33	1.65632e-31	360	350
ST8SIA4	0.550805	8.06366e-31	4.11908e-29	360	371
STAC3	0.529137	3.72369e-28	1.67457e-26	360	371
STAP1	0.552184	5.37415e-31	2.78088e-29	360	283
STK10	0.515573	1.39214e-26	5.79003e-25	360	371
STK17B	0.51571	1.34327e-26	5.59846e-25	360	371
SYK	0.65127	3.79695e-46	8.69458e-44	360	371
SYTL1	0.547654	2.02383e-30	1.0105e-28	360	371
SYTL3	0.555116	2.25393e-31	1.20061e-29	360	371
TAGAP	0.605098	2.00263e-38	1.89982e-36	360	371
TBC1D10C	0.61142	2.08437e-39	2.18552e-37	360	371
TBX21	0.545969	3.29616e-30	1.61739e-28	360	371
TBXAS1	0.635603	2.22525e-43	3.43654e-41	360	371
TCL1A	0.502046	4.40026e-25	1.654e-23	360	280
TFEC	0.597086	3.27896e-37	2.84015e-35	360	370
TGFB1	0.503841	2.80736e-25	1.06328e-23	360	371
THEMIS	0.557738	1.02854e-31	5.55298e-30	360	361
TIFAB	0.657288	2.96639e-47	7.77583e-45	360	342
TIGIT	0.640262	3.47587e-44	6.07424e-42	360	368
TLR7	0.559624	5.82592e-32	3.1625e-30	360	371
TLR8	0.59852	1.99933e-37	1.75465e-35	360	367
TM6SF1	0.55433	2.84743e-31	1.4928e-29	360	371
TMC6	0.514987	1.62216e-26	6.62227e-25	360	371
TMC8	0.679364	1.52431e-51	7.40667e-49	360	371
TMEM71	0.584494	2.27257e-35	1.67682e-33	360	369
TMSB10	0.522165	2.44446e-27	1.05637e-25	360	371
TMSL3	0.58932	4.57699e-36	3.60406e-34	360	371
TNFAIP8L2	0.653199	1.68804e-46	4.0517e-44	360	371
TNFAIP8	0.575412	4.31594e-34	2.73829e-32	360	371
TNFRSF13B	0.58312	3.56882e-35	2.53922e-33	360	275
TNFRSF17	0.542897	7.96912e-30	3.86279e-28	360	253
TNFRSF18	0.591085	2.52952e-36	2.02382e-34	360	367
TNFRSF8	0.657931	2.25131e-47	6.0609e-45	360	365
TNFSF13B	0.575578	4.09319e-34	2.61361e-32	360	369
TNF	0.580071	9.64276e-35	6.53412e-33	360	352
TNIP3	0.501105	5.56255e-25	2.07135e-23	360	244
TRAF3IP3	0.620429	7.58278e-41	9.04575e-39	360	371
TRAF5	0.511603	3.8983e-26	1.55324e-24	360	371
TRAT1	0.573824	7.15353e-34	4.46748e-32	360	354
TRERF1	0.506506	1.43348e-25	5.55599e-24	360	371
TRPM2	0.549095	1.33021e-30	6.70895e-29	360	371
TRPV2	0.513635	2.30518e-26	9.27753e-25	360	371
TSPAN32	0.522555	2.20307e-27	9.60382e-26	360	368
TYROBP	0.628858	3.09289e-42	4.24942e-40	360	371
UBASH3A	0.615495	4.71855e-40	5.28107e-38	360	363
UBASH3B	0.584954	1.95286e-35	1.44628e-33	360	371
UCP2	0.646277	3.01502e-45	6.12911e-43	360	371
UNC13D	0.62589	9.64911e-42	1.22439e-39	360	371
VASP	0.510457	5.23358e-26	2.07283e-24	360	371
VAV1	0.700708	4.59233e-56	5.47211e-53	360	371
VILL	0.540058	1.78715e-29	8.45689e-28	360	371
VIM	0.513213	2.5719e-26	1.02886e-24	360	371
VOPP1	0.501313	5.28188e-25	1.97052e-23	360	371
WAS	0.627547	5.11973e-42	6.84532e-40	360	371
WDFY4	0.667682	3.15286e-49	1.14202e-46	360	371
WIPF1	0.656942	3.4399e-47	8.78586e-45	360	371
WNT10A	0.637181	1.19058e-43	1.93174e-41	360	336
YPEL4	0.526096	8.50832e-28	3.77512e-26	360	364
ZAP70	0.60413	2.81888e-38	2.6615e-36	360	371
ZBED2	0.566332	7.48637e-33	4.36092e-31	360	296
ZBP1	0.630812	1.45288e-42	2.06745e-40	360	366
ZCCHC18	0.554749	2.5137e-31	1.32833e-29	360	343
ZNF831	0.56416	1.46217e-32	8.39357e-31	360	365
