# Supplementary material for: Comprehensive analysis of the correlations of S100B with hypoxia response and immune infiltration in hepatocellular carcinoma
Source: PeerJ. 2022 Mar 29;10:e13201. doi: 10.7717/peerj.13201 (PMC8973469; doi:10.7717/peerj.13201)
Supplement: Supplemental Information 5 [file peerj-10-13201-s005.xlsx]

## Sheet: hypoxia and S100B
gene
AMPD3
ANO9
ARHGAP9
ARHGDIB
C16orf54
C1QC
CAMK4
CD300C
CD52
CMTM7
CSF3R
CTLA4
CXCR5
FAM105A
FCN1
FCRL2
FERMT3
FGD3
FGR
GAPT
GPR132
HLA-DOA
HLA-DQB1
IL16
IMPDH1
KCNK6
LAIR1
LAT2
LAT
LILRA5
LILRB4
MAP4K1
MEI1
MYO1F
ORAI2
PARVG
PIK3R5
PIK3R6
PLA2G2D
PTPN7
RHOH
RUNX2
SDC3
SIGLEC5
SIRPG
SLA
SPIB
STAC3
SYTL1
TCL1A
TMC8
TNFRSF8
ZAP70

## Sheet: S100B and HIF-1a
gene
ADAM28
ALOX5
AMPD3
APOBEC3C
CD84
CLEC7A
CXorf21
ELF4
FMNL3
FPR3
FUT8
GNB4
IQGAP1
ITGA4
KCTD12
KIAA1949
LRRK1
MNDA
PLAU
PTAFR
PTPLAD2
PTPRC
RAB31
RCSD1
RTN1
RUNX2
SAMSN1
ST8SIA4
STK17B
TAGAP
TFEC
TM6SF1
TRERF1
UBASH3B
